# Supplementary material for: Blended Interventions to Change Behavior in Patients With Chronic Somatic Disorders: Systematic Review
Source: PubMed Central journal article supplement (PMC5754569; doi:10.2196/jmir.8108), 2017-12-21
Supplement: jmir_v19i12e418_app2.pdf [file jmir_v19i12e418_app2.pdf]

| Author, year of publication | Study population (n, mean age in years, F: females [%]) | Chronic disorder         | Target behavior, duration of intervention               | Theoretical basis            | Description of blended intervention (therapeutic delivery mode and frequency; Internet-based delivery mode and frequency)                                    | Therapeutic guidance (T <sup>a</sup> ), online care (O <sup>b</sup> ), and blended integration (B <sup>c</sup> ) | Type of control intervention (C) <sup>d</sup> |
|-----------------------------|---------------------------------------------------------|--------------------------|---------------------------------------------------------|------------------------------|--------------------------------------------------------------------------------------------------------------------------------------------------------------|------------------------------------------------------------------------------------------------------------------|-----------------------------------------------|
| Allen et al, 2013           | n=68, mean age=45, F=78%                                | Obesity                  | Weight loss (nutrition and physical activity), 6 months | Social cognitive theory      | T1: 9 face-to-face sessions with counselor; T2: 7 face-to-face sessions with counselor; O: app with weekly assignments and (feedback) messages               | T: b<br>O: a, d, e<br>B: b                                                                                       | C1: c<br>C2: b                                |
| Bennett et al, 2010         | n=101, mean age=54, F=48%                               | Obesity and hypertension | Obesogenic behavior (individual selected), 3 months     | No                           | T: 2 face-to-face sessions and 2 phone calls with dietitian, ask-the-expert option, and forum with peers; O: website with weekly assignments and information | T: a, b, d, g<br>O: a, b<br>B: a                                                                                 | C: a                                          |
| De Boer et al, 2014         | n=72, mean age=52, F=64%                                | Chronic pain             | Pain thinking, feeling, and behaving; 4 months          | Cognitive behavioral therapy | T: weekly email contact with a cognitive behavior therapist; O: website with weekly assignments, enriched information, and messages                          | T: c<br>O: a, b, c, e<br>B: a                                                                                    | C: b                                          |
| Buhrman et al, 2004         | n=56, mean age=45, F=63%                                | Chronic back pain        | Pain thinking, feeling, and behaving, 6 weeks           | Fear avoidance model         | T: weekly phone calls with a therapist; O: website with weekly assignments and                                                                               | T: d<br>O: a, b<br>B: a                                                                                          | C: a                                          |

|                     |                           |                   |                                                |                                   |                                                                                                                                                                                                    |                                  |                |
|---------------------|---------------------------|-------------------|------------------------------------------------|-----------------------------------|----------------------------------------------------------------------------------------------------------------------------------------------------------------------------------------------------|----------------------------------|----------------|
|                     |                           |                   |                                                |                                   | information                                                                                                                                                                                        |                                  |                |
| Buhrman, 2011       | n=54, mean age=43, F=69%  | Chronic back pain | Pain thinking, feeling, and behaving, 11 weeks | Fear avoidance model              | T: weekly email contact with psychologist; O: website with weekly assignments and messages                                                                                                         | T: c<br>O: a, e<br>B: a          | C: a           |
| Buhrman et al, 2013 | n=76, mean age=49, F=59%  | Chronic pain      | Pain thinking, feeling, and behaving, 7 weeks  | Acceptance and commitment therapy | T: weekly email contact and 2 phone calls with clinical psychology graduate student; O: website with weekly assignments, enriched information, and messages                                        | T: c, d<br>O: a, b, c, e<br>B: a | C: a           |
| Buhrman et al, 2015 | n=52, mean age=51, F=85%  | Chronic pain      | Pain thinking, feeling, and behaving, 8 weeks  | Cognitive behavioral therapy      | T: weekly email contact and 2 phone calls with clinical psychology graduate student; O: website with weekly assignments, information, and messages                                                 | T: c, d<br>O: a, b, e<br>B: a    | C: a           |
| Dear et al, 2015    | n=490, mean age=50, F=80% | Chronic pain      | Pain thinking, feeling, and behaving, 8 weeks  | Cognitive behavioral therapy      | T1: weekly telephone or email contact with psychologist; T2: optional telephone and email contact with psychologist; O: website with 7 assignments, information, and automatic (feedback) messages | T: c, d<br>O: a, b, d, e<br>B: a | C1: a<br>C2: c |

|                      |                           |                                               |                                                               |                                                       |                                                                                                                                                                                 |                                     |      |
|----------------------|---------------------------|-----------------------------------------------|---------------------------------------------------------------|-------------------------------------------------------|---------------------------------------------------------------------------------------------------------------------------------------------------------------------------------|-------------------------------------|------|
| Dlugonski, 2012      | n=45, mean age=47, F=87%  | Multiple sclerosis                            | Physical activity, 12 weeks                                   | No                                                    | T: 7 videoconferencing sessions with health behavior coach; O: website with weekly assignments, information, and messages                                                       | T: f<br>O: a, b, e<br>B: a          | C: a |
| Ferwerda et al, 2017 | n=133, mean age=56, F=64% | Rheumatoid arthritis with heightened distress | Coping with symptoms, 9-65 weeks                              | Cognitive behavioral therapy                          | T: 1 face-to-face session with therapist, followed by weekly or biweekly email contact; O: website with assignments and psychoeducational texts                                 | T: a, b, c<br>O: a, b, c<br>B: a    | C: a |
| Friessen et al, 2017 | n=60, mean age=48, F=95%  | Fibromyalgia                                  | Coping with pain, 8 weeks                                     | Cognitive behavioral therapy                          | T: weekly telephone contact with trained student and email contact; O: website with weekly assignments, enriched information, and automated messages                            | T: c, d<br>O: a, b, c, e<br>B: a    | C: a |
| Glasgow et al, 2010  | n=463, mean age=58, F=50% | Diabetes Mellitus type II                     | Nutrition, physical activity, and medication taking, 4 months | Social ecological theory, 5 A's self-management model | T: 2 phone calls with therapist, 3 group sessions, and forum with peers; O: website with weekly assignments, enriched information, and automatic telephonic (feedback) messages | T: b, d, g<br>O: a, b, c, e<br>B: a | C: c |
| Hunt et al, 2009     | n=54, mean age=39, F=80%  | Irritable bowel syndrome                      | Stress management and catastrophic thinking, 5 weeks          | Cognitive behavioral therapy                          | T: weekly email contact with therapist; O: website with                                                                                                                         | T: c<br>O: a, b<br>B: a             | C: a |

|                                   |                           |                           |                                                                      |                                                                |                                                                                                                                                                               |                                     |                |
|-----------------------------------|---------------------------|---------------------------|----------------------------------------------------------------------|----------------------------------------------------------------|-------------------------------------------------------------------------------------------------------------------------------------------------------------------------------|-------------------------------------|----------------|
|                                   |                           |                           |                                                                      |                                                                | weekly assignments and information                                                                                                                                            |                                     |                |
| Jasper et al, 2014                | n=128, mean age=51, F=40% | Chronic tinnitus          | Relaxation, positive thinking, and cognitive restructuring, 10 weeks | Cognitive behavioral therapy                                   | T: weekly chat session and email contact with cognitive behavior therapist; O: website with weekly assignments and information                                                | T: a, c<br>O: a, b<br>B: b          | C1: b<br>C2: a |
| Klaren et al, 2014                | n=70, mean age=50, F=78%  | Multiple sclerosis        | Sedentary behavior, 6 months                                         | Social cognitive theory                                        | T: 13 videoconferences with coach; O: website with 13 assignments and enriched information                                                                                    | T: f<br>O: a, b, c<br>B: a          | C: a           |
| Liebreich, Plotnikoff et al, 2009 | n=49, mean age=54, F=59%  | Diabetes Mellitus type II | Physical activity, 12 weeks                                          | Social cognitive theory                                        | T: weekly email contact with counselor and ask-the-expert option, and forum with peers; O: website with weekly assignments and information                                    | T: a, c, g<br>O: a, b<br>B: a       | C: c           |
| Ljotsson, Hedman et al, 2011      | n=61, mean age=35, F=74%  | Irritable bowel syndrome  | Avoidance behavior, 10 weeks                                         | Acceptance and commitment therapy                              | Cognitive behavioral intervention; T: weekly email contact with psychologist, ask-the-expert option, and forum with peers; O: website with weekly assignments and information | T: a, c, g<br>O: a, b<br>B: a       | C: a           |
| McKay et al, 2001                 | n=78, mean age=52, F=53%  | Diabetes Mellitus type II | Physical activity, 8 weeks                                           | Multilevel social ecological model of diabetes self-management | Behavioral intervention to increase physical activity; T: weekly email contact with occupational therapist,                                                                   | T: a, c, g<br>O: a, b, c, d<br>B: a | C: c           |

|                         |                           |                                 |                                         |                                                      |                                                                                                                                                                                  |                                     |      |
|-------------------------|---------------------------|---------------------------------|-----------------------------------------|------------------------------------------------------|----------------------------------------------------------------------------------------------------------------------------------------------------------------------------------|-------------------------------------|------|
|                         |                           |                                 |                                         |                                                      | ask-the-expert option, and forum with peers;<br>O: website with weekly assignments                                                                                               |                                     |      |
| Moss Morris et al, 2012 | n=40, mean age=41, F=80%  | Multiple sclerosis              | Fatigue behavior, 10 weeks              | Cognitive behavioral therapy                         | T: 3 phone sessions of 30-60 min with assistant psychologist;<br>O: website with weekly assignments and information                                                              | T: d<br>O: a, b, c, e<br>B: a       | C: a |
| Nobis et al, 2015       | n=256, mean age=51, F=63% | Diabetes Mellitus type I and II | Depressive symptoms, 8 weeks            | Systematic behavioral activation and problem solving | T: weekly email or phone contact with psychologist or graduate student; O: website with weekly assignments, information, and automatic text messages                             | T: a, c, d, e<br>O: a, b, e<br>B: a | C: c |
| Nordin, et al, 2016     | n=99, mean age=43, F=85%  | Persistent musculoskeletal pain | Pain behavior, 4 months                 | Cognitive behavioral therapy                         | T: treatments from at least three different occupations according to an individualized treatment plan; O: website with assignments, enriched information, and automated messages | T: b<br>O: a, b, c, e<br>B: b       | C: b |
| Steel et al, 2016       | n=261, mean age=61, F=27% | Advanced cancer                 | Pain, fatigue, and depression, 6 months | Cognitive behavioral therapy                         | T: email contact every 2 weeks, face-to-face contact with care coordinator every 2 months, and forum with peers; O: website with assignments and enriched information            | T: a, b, c, g<br>O: a, b, c<br>B: b | C: a |

|                          |                           |                           |                                                                 |                                   |                                                                                                                                                                            |                                           |                |
|--------------------------|---------------------------|---------------------------|-----------------------------------------------------------------|-----------------------------------|----------------------------------------------------------------------------------------------------------------------------------------------------------------------------|-------------------------------------------|----------------|
| Torbjørnsen et al, 2014  | n=151, mean age=57, F=41% | Diabetes Mellitus type II | Nutrition and physical activity, 4 months                       | No                                | T: 5 phone sessions with a diabetes specialist nurse and ask-the-expert option; O: app with daily assignment, enriched information, and (feedback) messages                | T: a, d<br>O: a, b, c, d, e<br>B: b       | C1: c<br>C2: a |
| Trompetter et al, 2015   | n=238, mean age=53, F=76% | Chronic pain              | Pain behavior, 3 months                                         | Acceptance and commitment therapy | T: weekly email contact with counselor; O: website with weekly assignments and enriched information                                                                        | T: c<br>O: a, b, c<br>B: a                | C1: c<br>C2: a |
| van Beugen et al, 2016   | n=131, mean age=53, F=49% | Psoriasis                 | Pain, fatigue, and negative mood, 25 weeks                      | Cognitive behavioral therapy      | T: 2 face-to-face sessions with therapist, telephonic instruction, and weekly feedback emails; O: website with information and assignments                                 | T: b, c, d<br>O: a, b<br>B: b             | C: a           |
| van der Berg et al, 2006 | n=160, mean age=50, F=76% | Rheumatoid arthritis      | Physical activity, 12 months                                    | No                                | T: weekly email contact with physical therapist, 4 group meetings, and forum with peers; O: website with weekly assignments                                                | T: b, c, g<br>O: a<br>B: b                | C: c           |
| Van der Meer et al, 2009 | n=200, mean age=31, F=69% | Asthma                    | Asthma control: measuring FEV1 and inhaler technique, 12 months | No                                | T: 1 group session and optional phone calls and email contact with a respiratory nurse; O: website with weekly assignments, enriched information, and automatic (feedback) | T: a, b, c, d, e<br>O: a, b, d, e<br>B: a | C: a           |

|                            |                           |                                   |                                           |                              | messages                                                                                                                                                                                                                                                    |                                           |                |
|----------------------------|---------------------------|-----------------------------------|-------------------------------------------|------------------------------|-------------------------------------------------------------------------------------------------------------------------------------------------------------------------------------------------------------------------------------------------------------|-------------------------------------------|----------------|
| Van der Weegen et al, 2015 | n=199, mean age=58, F=51% | COPD or Diabetes Mellitus type II | Physical activity, 4-6 months             | No                           | T: 4 face-to-face sessions with nurse and mail contact, and option to request for advice; O: activity tracker, mobile app and website with assignments, and automated tailored feedback messages                                                            | T: a, b, c<br>O: a, d, e<br>B: a          | C1: a<br>C2: b |
| Yardley et al, 2014        | n=179, mean age=51, F=66% | Obesity                           | Weight management and nutrition, 6 months | Cognitive behavioral therapy | T1: 3 face-to-face, phone, or email contacts with a nurse and ask-the-expert option; T2: 7 face-to-face, phone, or email contacts with a nurse and ask-the-expert option; O: website with weekly assignments, enriched information, and (feedback) messages | T: a, b, c, d<br>O: a, b, c, d, e<br>B: a | C1: a<br>C2: c |

<sup>a</sup>T: therapeutic guidance: (1) option to request for advice, (2) face-to-face contact, (3) email, (4) phone calls, (5) short messaging service, (6) videoconferencing, and (7) discussion forum with peers.

<sup>b</sup>O: online care: (1) assignments, (2) information, (3) enriched information environment, (4) automated tailored feedback, and (5) automated messages.

<sup>c</sup>B: blended integration: (1) online care and therapeutic guidance are integrated and (2) online care and professionals are two separate elements.

<sup>d</sup>C: control conditions: (1) no intervention, (2) face-to-face behavior change interventions, and (3) online behavior change intervention.
