# Supplementary material for: Blended Interventions to Change Behavior in Patients With Chronic Somatic Disorders: Systematic Review
Source: PubMed Central journal article supplement (PMC5754569; doi:10.2196/jmir.8108), 2017-12-21
Supplement: jmir_v19i12e418_app3.pdf [file jmir_v19i12e418_app3.pdf]

| Author, year of publication | Random sequence generation | Allocation concealment | Blinding of outcome assessor | Incomplete outcome data | Selective reporting | Group similarity at baseline | Cointervention | Compliance | Intention-to-treat analysis | Timing outcome assessments | Score (0-10) <sup>a</sup> | Total: low or high quality |
|-----------------------------|----------------------------|------------------------|------------------------------|-------------------------|---------------------|------------------------------|----------------|------------|-----------------------------|----------------------------|---------------------------|----------------------------|
| Allen et al, 2013 [37]      | L <sup>b</sup>             | U <sup>c</sup>         | U                            | L                       | L                   | L                            | U              | L          | H <sup>d</sup>              | L                          | 6                         | High                       |
| Bennett et al, 2010 [38]    | L                          | U                      | U                            | L                       | L                   | L                            | U              | L          | L                           | L                          | 7                         | High                       |
| De Boer et al, 2014 [20]    | L                          | L                      | U                            | L                       | L                   | U                            | U              | L          | L                           | L                          | 7                         | High                       |
| Buhrman et al, 2004 [21]    | L                          | U                      | U                            | L                       | L                   | L                            | U              | U          | H                           | L                          | 5                         | Low                        |
| Buhrman, 2011 [23]          | L                          | U                      | U                            | L                       | L                   | L                            | U              | U          | L                           | L                          | 6                         | High                       |
| Buhrman et al, 2013 [22]    | L                          | L                      | U                            | L                       | L                   | L                            | U              | U          | L                           | L                          | 7                         | High                       |
| Buhrman et al, 2015 [24]    | L                          | L                      | U                            | L                       | L                   | L                            | U              | U          | L                           | L                          | 7                         | High                       |
| Dear et al, 2015 [25]       | L                          | L                      | U                            | L                       | L                   | L                            | U              | U          | U                           | L                          | 6                         | High                       |
| Dlugonski et al, 2012 [45]  | L                          | H                      | U                            | L                       | L                   | L                            | U              | L          | L                           | L                          | 7                         | High                       |

|                              |   |   |   |   |   |   |   |   |   |   |   |      |
|------------------------------|---|---|---|---|---|---|---|---|---|---|---|------|
| Ferwerda et al, 2017 [33]    | L | L | U | H | L | L | U | H | L | L | 6 | High |
| Friessen et al, 2017 [34]    | L | L | H | L | L | L | U | L | L | L | 8 | High |
| Glasgow et al, 2010 [40]     | L | U | U | L | L | L | U | L | L | L | 7 | High |
| Hunt et al, 2009 [28]        | L | H | U | H | L | L | U | U | H | L | 4 | Low  |
| Jasper et al, 2014 [30]      | L | L | U | L | L | L | U | L | L | L | 8 | High |
| Klaren et al, 2014 [46]      | L | L | U | U | H | H | U | U | L | L | 4 | Low  |
| Liebreich et al, 2009 [41]   | L | U | U | L | L | H | U | L | L | L | 6 | High |
| Ljotsson et al, 2011 [29]    | L | L | U | L | L | L | U | L | L | L | 8 | High |
| McKay et al, 2001 [42]       | L | L | U | L | L | L | U | L | L | L | 8 | High |
| Moss Morris et al, 2012 [32] | L | U | U | L | L | H | L | L | L | L | 7 | High |
| Nobis et al, 2015 [31]       | L | U | U | L | L | L | U | L | L | L | 7 | High |
| Nordin et al, 2016 [27]      | L | L | U | L | H | L | U | L | L | L | 7 | High |

|                                 |   |   |   |   |   |   |   |   |   |   |    |      |
|---------------------------------|---|---|---|---|---|---|---|---|---|---|----|------|
| Steel et al, 2016 [36]          | L | L | L | L | L | L | U | L | L | L | 9  | High |
| Torbjørnsen et al, 2014 [43]    | L | L | U | L | H | L | U | U | L | L | 6  | High |
| Trompetter et al, 2015 [26]     | L | U | U | L | L | L | U | L | L | L | 7  | High |
| van Beugen et al, 2016 [35]     | L | L | U | H | L | L | U | L | L | L | 7  | High |
| van der Berg et al, 2006[47]    | L | L | L | L | L | L | L | L | L | L | 10 | High |
| Van der Meer et al, 2009 [48]   | L | H | U | H | L | L | U | U | H | L | 4  | Low  |
| Van der Weegen et al, 2015 [44] | L | L | L | L | L | H | U | U | L | L | 7  | High |
| Yardley et al, 2014 [39]        | L | H | H | L | H | L | H | L | L | L | 6  | High |

<sup>a</sup>Total score: low risk=1 point; unclear or high risk=0 point; low quality=0-5 points, high quality=6 points or more.

<sup>b</sup>L: low risk.

<sup>c</sup>U: unclear.

<sup>d</sup>H: high risk.
