# Supplementary material for: Blended Interventions to Change Behavior in Patients With Chronic Somatic Disorders: Systematic Review
Source: PubMed Central journal article supplement (PMC5754569; doi:10.2196/jmir.8108), 2017-12-21
Supplement: jmir_v19i12e418_app4.pdf [file jmir_v19i12e418_app4.pdf]

| Author, year of publication           | Outcome measure | Instrument                                                   | Time of measurement (pre- and post-treatment) | Pre-treatment mean (SD)              | Post-treatment mean (SD)             | Significant effect |
|---------------------------------------|-----------------|--------------------------------------------------------------|-----------------------------------------------|--------------------------------------|--------------------------------------|--------------------|
| <b>Symptoms and Signs</b>             |                 |                                                              |                                               |                                      |                                      |                    |
| Bennett, 2010                         | Body weight     | Weighing scale                                               | 0, 12 weeks                                   | I: 101.0 (15.4)<br>C: 97.3 (10.9)    | I: 98.7 (3.2)<br>C: 97.6 (0.6)       | No                 |
|                                       | BMI             | Scale and meter                                              | 0, 12 weeks                                   | I: 35.0 (3.5)<br>C: 34.6 (3.2)       | I: 34.1 (1.2)<br>C: 34.5 (0.8)       | No                 |
| Buhrman, 2004                         | Pain            | Scale 0-100, average score of 3 daily assessments            | 0, 8 weeks                                    | I: 37.4 (18.2)<br>C: 44.4 (14.2)     | I: 34.3 (16.8)<br>C: 39.6 (16.3)     | No                 |
|                                       | Pain            | Multidimensional Pain Inventory: subscale pain severity      | 0, 8 weeks                                    | I: 3.8 (1.9)<br>C: 5.0 (1.7)         | I: 2.4 (1.1)<br>C: 3.2 (0.8)         | No                 |
| Buhrman, 2011                         | Pain            | Multidimensional Pain Inventory: subscale pain severity      | 0, 12 weeks                                   | I: 3.5 (2.5)<br>C: 3.2 (2.2)         | I: 3.2 (2.2)<br>C: 3.4 (2.6)         | No                 |
| Buhrman, 2013                         | Pain            | Multidimensional Pain Inventory: subscale pain severity      | 0, 8 weeks                                    | I: 4.51 (0.80)<br>C: 4.35 (0.88)     | I: 4.30 (1.04)<br>C: 4.29 (1.00)     | No                 |
| Buhrman, 2015                         | Pain            | Multidimensional Pain Inventory: subscale pain severity      | 0, 8 weeks                                    | I: 3.81 (1.14)<br>C: 3.90 (0.89)     | I: 3.75 (1.05)<br>C: 3.95 (0.93)     | No                 |
| Dear, 2015<br>*regular contact group  | Pain            | Wilkinson Brief Pain Questionnaire                           | 0, 8 weeks                                    | I: 5.74 (1.72)<br>C: 5.98 (1.53)     | I: 4.86 (1.79)<br>C: 5.71 (1.50)     | Yes                |
| Dear, 2015<br>*optional contact group | Pain            | Wilkinson Brief Pain Questionnaire                           | 0, 8 weeks                                    | I: 5.54 (1.74)<br>C: 5.98 (1.53)     | I: 4.85 (1.73)<br>C: 5.71 (1.50)     | Yes                |
| Ferwerda, 2017                        | Pain            | Impact of Rheumatic Diseases on General Health and Lifestyle | 0, post-intervention                          | I: 14.78 (4.76)<br>C: 15.77 (3.88)   | I: 14.60 (4.50)<br>C: 15.68 (3.73)   | No                 |
|                                       | Fatigue         | Checklist Individual Strength                                | 0, post-intervention                          | I: 35.98 (11.49)<br>C: 38.24 (10.06) | I: 32.13 (11.46)<br>C: 35.88 (10.71) | No                 |

|                    |                                                                        |                                                 |                      |                                      |                                      |     |
|--------------------|------------------------------------------------------------------------|-------------------------------------------------|----------------------|--------------------------------------|--------------------------------------|-----|
|                    | Disease activity                                                       | Rheumatoid Arthritis Disease Activity Index     | 0, post-intervention | I: 3.31 (1.99)<br>C: 3.84 (1.75)     | I: 3.19 (2.10)<br>C: 3.62 (1.68)     | No  |
| Friessen, 2017     | Severity and symptoms of fibromyalgia                                  | Revised Fibromyalgia Impact Questionnaire       | 0, 8 weeks           | I: 65.19 (13.07)<br>C: 67.75 (13.51) | I: 53.39 (18.94)<br>C: 64.59 (12.75) | Yes |
|                    | Pain                                                                   | Brief Pain Inventory – subscale pain severity   | 0, 8 weeks           | I: 5.45 (1.10)<br>C: 6.02 (1.39)     | I: 4.99 (1.66)<br>C: 6.28 (1.28)     | Yes |
|                    | Fatigue                                                                | Fatigue Symptom Inventory                       | 0, 8 weeks           | I: 44.30 (12.83)<br>C: 49.20 (14.29) | I: 39.69 (15.10)<br>C: 47.87 (12.75) | No  |
| Hunt, 2009         | Abdominal symptoms: pain, bloating, constipation, diarrhea and satiety | Gastrointestinal Symptom Rating Scale           | 0, 5 weeks           | I: 57 (13)<br>C: 61 (14)             | I: 35 (12)<br>C: 52 (14)             | Yes |
| Ljotsson, 2011     | Abdominal symptoms: pain, bloating, constipation, diarrhea and satiety | Gastrointestinal Symptom Rating Scale           | 0, 10 weeks          | I: 44.6 (11.1)<br>C: 39.8 (12.0)     | I: 31.0 (10.2)<br>C: 40.9 (14.5)     | Yes |
| Van der Meer, 2009 | Forced expiratory volume in 1 second (FEV1)                            | Handheld electronic spirometer                  | 0, 12 months         | I: 3.08 (NM)<br>C: 3.13 (NM)         | I: 3.32 (NM)<br>C: 3.12 (NM)         | Yes |
| Steel, 2016        | Fatigue                                                                | Functional Assessment of Cancer Therapy-Fatigue | 0, 6 months          | I: 36.8 (7.9)<br>C: 35.4 (7.1)       | I: 28.3 (9.4)<br>C: 31.1 (11.4)      | No  |
|                    | Pain and impact on functioning                                         | Brief Pain Inventory                            | 0, 6 months          | I: 5.8 (1.2)<br>C: 6.1 (1.6)         | I: 4.7 (1.5)<br>C: 6.1 (2.6)         | No  |
| Torbjørnsen, 2014  | Hemoglobin                                                             | DCA Vantage Analyzer                            | 0, 4 months          | I: 8.2 (1.08)<br>C: 8.3 (1.08)       | I: 7.8 (1.44)<br>C: 8.0 (1.44)       | No  |
| Trompetter, 2015   | Pain                                                                   | Pain NRS                                        | 0, 3 months          | I: 6.3 (1.6)<br>C: 6.2 (1.6)         | I: 5.4 (2.2)<br>C: 5.6 (2.1)         | No  |
| Van Beugen, 2016   | Fatigue                                                                | Checklist Individual Strength                   | 0, post-treatment    | I: 37.70 (10.68)<br>C: 34.31 (10.30) | I: 30.77 (12.46)<br>C: 33.8 (9.19)   | Yes |
|                    | Itch                                                                   | Impact of chronic Skin Disease on               | 0, post-treatment    | I: 9.44 (3.50)<br>C: 9.06 (3.75)     | I: 7.09 (3.51)<br>C: 7.44 (3.67)     | No  |

|                                         |                                                    |                                                              |                      |                                        |                                      |     |
|-----------------------------------------|----------------------------------------------------|--------------------------------------------------------------|----------------------|----------------------------------------|--------------------------------------|-----|
|                                         |                                                    | daily Life - itch subscale                                   |                      |                                        |                                      |     |
|                                         | Psoriasis severity - clinician rated               | Psoriasis Area and Severity Index                            | 0, post-treatment    | I: 5.99 (5.61)<br>C: 4.20 (2.87)       | I: 5.04 (4.59)<br>C: 3.79 (2.94)     | No  |
|                                         | Psoriasis severity - self-reported                 | Psoriasis Area and Severity Index                            | 0, post-treatment    | I: 5.27 (3.29)<br>C: 4.48 (2.41)       | I: 4.61 (5.39)<br>C: 3.95 (2.26)     | No  |
| Yardley, 2014<br>*basic nurse support   | Body weight                                        | Weighing scale                                               | 0, 6 months          | I: 103.43 (25.23)<br>C: 103.27 (20.09) | I: 97.92 (5.80)<br>C: 99.38 (5.75)   | No  |
| Yardley, 2014<br>*regular nurse support | Body weight                                        | Weighing scale                                               | 0, 6 months          | I: 100.36 (19.38)<br>C: 103.27 (20.09) | I: 97.14 (5.74)<br>C: 99.38 (5.75)   | No  |
| <b>Limitations in daily activities</b>  |                                                    |                                                              |                      |                                        |                                      |     |
| Buhrman, 2015                           | Disruption of daily activities by chronic pain     | Pain Disability Index                                        | 0, 8 weeks           | I: 36.71 (9.96)<br>C: 36.96 (10.25)    | I: 32.13 (9.64)<br>C: 36.65 (9.91)   | Yes |
| Dear, 2015<br>*regular contact group    | Backpain associated disability in daily activities | Roland-Morris Disability Questionnaire                       | 0, 8 weeks           | I: 13.47 (5.23)<br>C: 13.93 (5.22)     | I: 11.05 (5.63)<br>C: 13.97 (5.17)   | Yes |
| Dear, 2015<br>*optional contact group   | Backpain associated disability in daily activities | Roland-Morris Disability Questionnaire                       | 0, 8 weeks           | I: 13.24 (5.60)<br>C: 13.93 (5.22)     | I: 10.95 (5.84)<br>C: 13.97 (5.17)   | Yes |
| Dlugonski, 2012                         | Walking mobility                                   | Multiple Sclerosis Walking Scale-12                          | 0, 3 months          | I: 27.4 (22.0)<br>C: 24.9 (25.0)       | I: 30.9 (22.1)<br>C: 27.0 (25.6)     | No  |
|                                         | Physical activity                                  | Godin Leisure-Time Exercise Questionnaire                    | 0, 3 months          | I: 13.6 (11.6)<br>C: 16.1 (14.2)       | I: 28.2 (15.6)<br>C: 15.4 (13.9)     | Yes |
| Ferwerda, 2017                          | Self-care                                          | Impact of Rheumatic Diseases on General Health and Lifestyle | 0, post-intervention | I: 27.39 (5.72)<br>C: 25.04 (6.52)     | I: 27.35 (5.94)<br>C: 24.41 (6.92)   | No  |
|                                         | Mobility                                           | Impact of Rheumatic Diseases on General Health and Lifestyle | 0, post-intervention | I: 22.00 (5.78)<br>C: 19.82 (6.40)     | I: 22.30 (5.55)<br>C: 19.37 (6.55)   | No  |
| Jasper, 2014                            | Insomnia                                           | Insomnia Severity index                                      | 0, 10 weeks          | I: 12.68 (5.91)<br>C: 11.25 (6.51)     | I: 8.70 (5.80)<br>C: 10.91 (7.21)    | Yes |
| Klaren, 2014                            | Sedentary behavior                                 | International Physical Activity Questionnaire                | 0, 6 months          | I: 550 (233)<br>C: 412 (193)           | I: 429.2 (201.2)<br>C: 528.2 (200.7) | Yes |
| Ljotsson, 2011                          | Functional                                         | Sheehan                                                      | 0, 10 weeks          | I: 11.9 (8.1)                          | I: 8.7 (6.3)                         | Yes |

|                                                               |                                                   |                                                                    |                      |                                    |                                    |     |
|---------------------------------------------------------------|---------------------------------------------------|--------------------------------------------------------------------|----------------------|------------------------------------|------------------------------------|-----|
|                                                               | impairment in work/school, social life and family | Disability Scales                                                  |                      | C: 6.4 (6.7)                       | C: 7.8 (7.6)                       |     |
| Trompetter, 2015                                              | Disruption of daily activities by chronic pain    | Pain Disability Index                                              | 0, 3 months          | I: 36.0 (12.7)<br>C: 36.1 (12.7)   | I: 30.6 (14.5)<br>C: 33.0 (14.0)   | No  |
| Van der Weegen, 2015                                          | Physical activity                                 | Pam accelerometer                                                  | 0, post-intervention | I: 39.29 (18.1)<br>C: 44.13 (20.3) | I: 48.16 (23.8)<br>C: 39.16 (19.5) | Yes |
| <b>Dealing with the chronic condition: cognitive measures</b> |                                                   |                                                                    |                      |                                    |                                    |     |
| Buhrman, 2004                                                 | Coping strategy: diverting attention              | Coping Strategy Questionnaire: subscale diverting attention        | 0, 8 weeks           | I: 11.6 (5.7)<br>C: 12.3 (7.4)     | I: 12.3 (5.2)<br>C: 11.9 (6.9)     | No  |
|                                                               | Coping strategy: reinterpret pain sensation       | Coping Strategy Questionnaire: subscale reinterpret pain sensation | 0, 8 weeks           | I: 3.6 (3.5)<br>C: 5.4 (6.5)       | I: 4.4 (3.6)<br>C: 4.6 (5.9)       | No  |
|                                                               | Coping strategy: coping self-statements           | Coping Strategy Questionnaire: subscale coping self-statements     | 0, 8 weeks           | I: 18.4 (6.5)<br>C: 18.3 (6.6)     | I: 19.1 (5.8)<br>C: 17.3 (6.7)     | No  |
|                                                               | Coping strategy: ignore pain sensations           | Coping Strategy Questionnaire: subscale ignore pain sensations     | 0, 8 weeks           | I: 13.1 (13.7)<br>C: 13.5 (6.6)    | I: 13.7 (7.0)<br>C: 12.9 (6.5)     | No  |
|                                                               | Coping strategy: praying or hoping                | Coping Strategy Questionnaire: subscale praying or hoping          | 0, 8 weeks           | I: 12.0 (6.9)<br>C: 10.4 (6.7)     | I: 9.8 (5.1)<br>C: 8.5 (6.0)       | No  |
|                                                               | Coping strategy: catastrophizing                  | Coping Strategy Questionnaire: subscale catastrophizing            | 0, 8 weeks           | I: 13.6 (7.7)<br>C: 13.7 (6.9)     | I: 8.6 (5.2)<br>C: 12.3 (7.2)      | Yes |
|                                                               | Coping strategy: control over pain                | Coping Strategy Questionnaire: subscale control over pain          | 0, 8 weeks           | I: 2.8 (1.0)<br>C: 2.9 (1.1)       | I: 3.9 (0.7)<br>C: 2.9 (1.0)       | Yes |
|                                                               | Coping strategy: ability to decrease pain         | Coping Strategy Questionnaire: subscale ability to decrease pain   | 0, 8 weeks           | I: 3.0 (0.8)<br>C: 2.6 (1.0)       | I: 3.9 (0.9)<br>C: 2.9 (1.0)       | Yes |
|                                                               | Perceived life control                            | Multidimensional Pain Inventory: subscale life control             | 0, 8 weeks           | I: 3.1 (1.1)<br>C: 2.7 (0.9)       | I: 3.9 (1.0)<br>C: 3.1 (0.9)       | No  |
|                                                               | Perception of support received from               | Multidimensional Pain Inventory: subscale                          | 0, 8 weeks           | I: 4.0 (1.6)<br>C: 3.9 (1.5)       | I: 4.2 (1.3)<br>C: 3.8 (1.6)       | No  |

|               |                                                    |                                                                    |             |                                  |                                  |     |
|---------------|----------------------------------------------------|--------------------------------------------------------------------|-------------|----------------------------------|----------------------------------|-----|
|               | others                                             |                                                                    |             |                                  |                                  |     |
|               | Perception of received punishing responses         | Multidimensional Pain Inventory: subscale punishing responses      | 0, 8 weeks  | I: 1.0 (1.4)<br>C: 1.5 (1.4)     | I: 0.7 (1.1)<br>C: 1.2 (1.3)     | No  |
|               | Perception of received solicitous responses        | Multidimensional Pain Inventory: subscale solicitous responses     | 0, 8 weeks  | I: 2.3 (1.4)<br>C: 2.1 (1.4)     | I: 2.3 (1.2)<br>C: 1.9 (1.5)     | No  |
|               | Perception of received distracting responses       | Multidimensional Pain Inventory: subscale distracting responses    | 0, 8 weeks  | I: 2.5 (1.7)<br>C: 2.7 (1.7)     | I: 2.5 (1.6)<br>C: 2.5 (1.7)     | No  |
| Buhrman, 2011 | Beliefs and attitudes associated with chronic pain | Pain and Impairment Relationship Scale                             | 0, 12 weeks | I: 53.3 (10.4)<br>C: 48.3 (13.7) | I: 49.1 (11.0)<br>C: 46.1 (18.7) | No  |
|               | Coping strategy: diverting attention               | Coping Strategy Questionnaire: subscale diverting attention        | 0, 12 weeks | I: 11.2 (5.9)<br>C: 11.4 (5.7)   | I: 11.5 (6.5)<br>C: 10.8 (5.5)   | No  |
|               | Coping strategy: reinterpret pain sensation        | Coping Strategy Questionnaire: subscale reinterpret pain sensation | 0, 12 weeks | I: 5.3 (5.2)<br>C: 5.4 (3.9)     | I: 6.2 (4.5)<br>C: 6.1 (5.1)     | No  |
|               | Coping strategy: coping self-statements            | Coping Strategy Questionnaire: subscale coping self-statements     | 0, 12 weeks | I: 21.0 (5.9)<br>C: 18.3 (6.7)   | I: 19.1 (7.6)<br>C: 19.4 (7.5)   | No  |
|               | Coping strategy: ignore pain sensations            | Coping Strategy Questionnaire: subscale ignore pain sensations     | 0, 12 weeks | I: 15.4 (6.0)<br>C: 15.3 (7.0)   | I: 17.6 (7.7)<br>C: 14.7 (7.4)   | No  |
|               | Coping strategy: praying or hoping                 | Coping Strategy Questionnaire: subscale praying or hoping          | 0, 12 weeks | I: 11.0 (7.4)<br>C: 10.8 (5.9)   | I: 10.8 (7.0)<br>C: 9.2 (5.9)    | No  |
|               | Coping strategy: catastrophizing                   | Coping Strategy Questionnaire: subscale catastrophizing            | 0, 12 weeks | I: 14.3 (6.1)<br>C: 12.0 (8.2)   | I: 9.5 (5.5)<br>C: 11.6 (8.2)    | Yes |
|               | Coping strategy: control over pain                 | Coping Strategy Questionnaire: subscale control over pain          | 0, 12 weeks | I: 3.3 (1.3)<br>C: 2.9 (1.4)     | I: 3.0 (1.1)<br>C: 2.8 (1.5)     | No  |
|               | Coping                                             | Coping Strategy                                                    | 0, 12 weeks | I: 3.1 (0.9)                     | I: 3.3 (0.8)                     | No  |

|               |                                                    |                                                                    |             |                                     |                                      |     |
|---------------|----------------------------------------------------|--------------------------------------------------------------------|-------------|-------------------------------------|--------------------------------------|-----|
|               | strategy: ability to decrease pain                 | Questionnaire: subscale ability to decrease pain                   |             | C: 3.0 (1.0)                        | C: 3.0 (1.2)                         |     |
|               | Perceived life control                             | Multidimensional Pain Inventory: subscale life control             | 0, 12 weeks | I: 3.1 (1.1)<br>C: 2.7 (0.9)        | I: 3.9 (1.0)<br>C: 3.1 (0.9)         | No  |
|               | Perception of support received from others         | Multidimensional Pain Inventory: subscale                          | 0, 12 weeks | I: 4.0 (1.6)<br>C: 3.9 (1.5)        | I: 4.2 (1.3)<br>C: 3.8 (1.6)         | No  |
|               | Perception of received punishing responses         | Multidimensional Pain Inventory: subscale punishing responses      | 0, 12 weeks | I: 1.0 (1.4)<br>C: 1.5 (1.4)        | I: 0.7 (1.1)<br>C: 1.2 (1.3)         | No  |
|               | Perception of received solicitous responses        | Multidimensional Pain Inventory: subscale solicitous responses     | 0, 12 weeks | I: 2.3 (1.4)<br>C: 2.1 (1.4)        | I: 2.3 (1.2)<br>C: 1.9 (1.5)         | No  |
|               | Perception of received distracting responses       | Multidimensional Pain Inventory: subscale distracting responses    | 0, 12 weeks | I: 2.5 (1.7)<br>C: 2.7 (1.7)        | I: 2.5 (1.6)<br>C: 2.5 (1.7)         | No  |
| Buhrman, 2013 | Beliefs and attitudes associated with chronic pain | Pain And Impairment Relationship Scale                             | 0, 8 weeks  | I: 60.89 (10.27)<br>C: 59.79 (9.93) | I: 55.88 (12.43)<br>C: 59.24 (10.29) | No  |
|               | Coping strategy: diverting attention               | Coping Strategy Questionnaire: subscale diverting attention        | 0, 8 weeks  | I: 15.01 (6.15)<br>C: 14.87 (6.10)  | I: 14.54 (6.08)<br>C: 14.76 (6.48)   | No  |
|               | Coping strategy: reinterpret pain sensation        | Coping Strategy Questionnaire: subscale reinterpret pain sensation | 0, 8 weeks  | I: 9.03 (5.65)<br>C: 8.29 (5.57)    | I: 9.39 (6.97)<br>C: 7.88 (5.25)     | No  |
|               | Coping strategy: coping self-statements            | Coping Strategy Questionnaire: subscale coping self-statements     | 0, 8 weeks  | I: 17.79 (5.58)<br>C: 18.18 (6.43)  | I: 18.66 (6.23)<br>C: 19.20 (6.24)   | No  |
|               | Coping strategy: ignore pain sensations            | Coping Strategy Questionnaire: subscale ignore pain sensations     | 0, 8 weeks  | I: 13.66 (5.85)<br>C: 14.26 (5.20)  | I: 14.40 (5.59)<br>C: 15.50 (5.33)   | No  |
|               | Coping strategy: praying or                        | Coping Strategy Questionnaire: subscale praying                    | 0, 8 weeks  | I: 12.00 (7.42)<br>C: 11.34 (6.73)  | I: 11.93 (7.96)<br>C: 13.96 (6.33)   | Yes |

|               |                                              |                                                                    |            |                                    |                                     |     |
|---------------|----------------------------------------------|--------------------------------------------------------------------|------------|------------------------------------|-------------------------------------|-----|
|               | hoping                                       | or hoping                                                          |            |                                    |                                     |     |
|               | Coping strategy: catastrophizing             | Coping Strategy Questionnaire: subscale catastrophizing            | 0, 8 weeks | I: 17.82 (5.78)<br>C: 18.58 (6.42) | I: 16.08 (5.91)<br>C: 19.00 (5.56)  | Yes |
|               | Perceived life control                       | Multidimensional Pain Inventory: subscale life control             | 0, 8 weeks | I: 2.62 (0.96)<br>C: 2.41 (1.21)   | I: 2.96 (1.67)<br>C: 2.54 (1.22)    | No  |
|               | Perception of support received from others   | Multidimensional Pain Inventory: subscale                          | 0, 8 weeks | I: 4.06 (1.55)<br>C: 4.11 (1.38)   | I: 3.69 (1.66)<br>C: 4.05 (1.33)    | No  |
|               | Perception of received punishing responses   | Multidimensional Pain Inventory: subscale punishing responses      | 0, 8 weeks | I: 2.17 (1.38)<br>C: 2.25 (1.52)   | I: 1.84 (1.49)<br>C: 2.15 (1.40)    | No  |
|               | Perception of received solicitous responses  | Multidimensional Pain Inventory: subscale solicitous responses     | 0, 8 weeks | I: 2.72 (1.60)<br>C: 2.73 (1.25)   | I: 2.44 (1.64)<br>C: 2.72 (1.34)    | No  |
|               | Perception of received distracting responses | Multidimensional Pain Inventory: subscale distracting responses    | 0, 8 weeks | I: 2.55 (1.36)<br>C: 2.19 (1.03)   | I: 2.60 (1.43)<br>C: 2.18 (1.16)    | No  |
| Buhrman, 2015 | Fear of symptoms                             | Anxiety Sensitivity Index                                          | 0, 8 weeks | I: 24.57 (2.61)<br>C: 18.87 (8.16) | I: 18.90 (12.23)<br>C: 17.37 (7.50) | No  |
|               | Pain-related catastrophizing                 | Pain Catastrophizing Scale                                         | 0, 8 weeks | I: 22.71 (8.58)<br>C: 24.58 (9.20) | I: 14.49 (9.49)<br>C: 22.94 (11.65) | Yes |
|               | Coping strategy: diverting attention         | Coping Strategy Questionnaire: subscale diverting attention        | 0, 8 weeks | I: 13.69 (5.06)<br>C: 11.87 (5.41) | I: 13.07 (6.09)<br>C: 12.41 (4.84)  | No  |
|               | Coping strategy: reinterpret pain sensation  | Coping Strategy Questionnaire: subscale reinterpret pain sensation | 0, 8 weeks | I: 6.25 (5.43)<br>C: 6.54 (6.09)   | I: 7.10 (6.22)<br>C: 5.75 (5.73)    | No  |
|               | Coping strategy: coping self-statements      | Coping Strategy Questionnaire: subscale coping self-statements     | 0, 8 weeks | I: 17.25 (5.68)<br>C: 16.70 (5.00) | I: 19.04 (6.63)<br>C: 18.86 (6.08)  | No  |
|               | Coping strategy: ignore pain sensations      | Coping Strategy Questionnaire: subscale ignore pain sensations     | 0, 8 weeks | I: 13.86 (8.98)<br>C: 14.96 (6.13) | I: 15.36 (7.64)<br>C: 16.73 (5.84)  | No  |
|               | Coping                                       | Coping Strategy                                                    | 0, 8 weeks | I: 9.68 (6.56)                     | I: 10.77 (7.49)                     | No  |

|                                          |                                              |                                                                 |            |                                      |                                      |     |
|------------------------------------------|----------------------------------------------|-----------------------------------------------------------------|------------|--------------------------------------|--------------------------------------|-----|
|                                          | strategy: praying or hoping                  | Questionnaire: subscale praying or hoping                       |            | C:10.58 (7.91)                       | C: 9.62 (8.00)                       |     |
|                                          | Coping strategy: catastrophizing             | Coping Strategy Questionnaire: subscale catastrophizing         | 0, 8 weeks | I: 16.36 (7.12)<br>C: 17.83 (6.84)   | I: 10.06 (6.35)<br>C: 16.36 (5.64)   | Yes |
|                                          | Perceived life control                       | Multidimensional Pain Inventory: subscale life control          | 0, 8 weeks | I: 2.41 (0.87)<br>C: 2.51 (0.79)     | I: 3.48 (1.42)<br>C: 2.94 (0.74)     | No  |
|                                          | Perception of support received from others   | Multidimensional Pain Inventory: subscale                       | 0, 8 weeks | I: 3.36 (1.57)<br>C:3.61 (1.36)      | I: 3.26 (1.70)<br>C: 3.89 (1.31)     | No  |
|                                          | Perception of received punishing responses   | Multidimensional Pain Inventory: subscale punishing responses   | 0, 8 weeks | I: 2.05 (1.51)<br>C: 2.10 (1.73)     | I: 2.13 (1.72)<br>C: 2.13 (1.72)     | No  |
|                                          | Perception of received solicitous responses  | Multidimensional Pain Inventory: subscale solicitous responses  | 0, 8 weeks | I: 2.57 (1.56)<br>C:2.41 (1.30)      | I: 2.17 (1.44)<br>C: 2.50 (1.38)     | No  |
|                                          | Perception of received distracting responses | Multidimensional Pain Inventory: subscale distracting responses | 0, 8 weeks | I: 3.42 (5.35)<br>C:2.29 (1.16)      | I: 2.41 (1.05)<br>C: 2.48 (1.30)     | No  |
| Dear, 2015<br>*regular<br>contact group  | Pain self-efficacy                           | Pain Self-efficacy Questionnaire                                | 0, 8 weeks | I: 28.86 (12.93)<br>C: 28.63 (12.10) | I: 35.94 (12.98)<br>C: 29.68 (12.11) | Yes |
|                                          | Fear of movement                             | TAMPA Scale of Kinesiophobia                                    | 0, 8 weeks | I: 38.59 (7.99)<br>C: 39.56 (8.67)   | I: 34.48 (7.00)<br>C: 37.65 (8.60)   | Yes |
|                                          | Acceptance of pain                           | Chronic Pain Acceptance Questionnaire                           | 0, 8 weeks | I: 22.58 (7.53)<br>C: 22.67 (7.52)   | I: 26.79 (6.69)<br>C: 23.66 (7.66)   | Yes |
| Dear, 2015<br>*optional<br>contact group | Pain self-efficacy                           | Pain Self-efficacy Questionnaire                                | 0, 8 weeks | I: 28.61 (14.08)<br>C: 28.63 (12.10) | I: 33.60 (13.83)<br>C: 29.68 (12.11) | Yes |
|                                          | Fear of movement                             | TAMPA Scale of Kinesiophobia                                    | 0, 8 weeks | I: 37.60 (8.40)<br>C:39.56 (8.67)    | I: 34.88 (7.80)<br>C: 37.65 (8.60)   | Yes |
|                                          | Acceptance of pain                           | Chronic Pain Acceptance Questionnaire                           | 0, 8 weeks | I: 23.30 (7.72)<br>C: 22.67 (7.52)   | I: 25.40 (8.01)<br>C: 23.66 (7.66)   | No  |
| Friessen, 2017                           | Fear of movement                             | TAMPA Scale of Kinesiophobia                                    | 0, 8 weeks | I: 38.35 (7.39)<br>C: 40.57 (5.55)   | I: 33.87 (6.25)<br>C: 42.73 (4.64)   | No  |
|                                          | Pain self-efficacy                           | Pain Self-Efficacy Questionnaire                                | 0, 8 weeks | I: 22.93 (9.78)<br>C: 19.83          | I: 29.99 (11.10)<br>C: 22.00 (10.18) | No  |



|                                                                |                                                  |                                                                 |                      |                                      |                                      |     |
|----------------------------------------------------------------|--------------------------------------------------|-----------------------------------------------------------------|----------------------|--------------------------------------|--------------------------------------|-----|
|                                                                |                                                  |                                                                 |                      | (10.25)                              |                                      |     |
|                                                                | Pain coping                                      | Pain Responses Self-Statements: subscale coping                 | 0, 8 weeks           | I: 29.73 (5.94)<br>C: 23.77 (8.22)   | I: 31.99 (5.72)<br>C: 23.75 (7.74)   | No  |
|                                                                | Pain catastrophizing                             | Pain Responses Self-Statements: subscale catastrophizing        | 0, 8 weeks           | I: 21.52 (7.37)<br>C: 24.53 (9.77)   | I: 17.23 (9.26)<br>C: 24.09 (9.51)   | No  |
| Hunt, 2009                                                     | Catastrophizing                                  | Consequences of Physical Sensations Questionnaire               | 0, 5 weeks           | I: 2.1 (0.51)<br>C: 2.1 (0.57)       | I: 1.25 (0.39)<br>C: 2.1 (0.56)      | Yes |
| Jasper, 2014                                                   | Acceptance                                       | Tinnitus Acceptance Questionnaire                               | 0, 10 weeks          | I: 42.07 (11.70)<br>C: 42.84 (13.48) | I: 47.91 (11.70)<br>C: 43.99 (13.51) | Yes |
| Ljotsson, 2011                                                 | Fear of irritable bowel syndrome symptoms        | Visceral Sensitivity Index                                      | 0, 10 weeks          | I: 32.5 (18.0)<br>C: 27.5 (16.3)     | I: 14.1 (15.1)<br>C: 26.2 (17.9)     | Yes |
| Moss Morris, 2012                                              | The impact of fatigue on patient's daily life    | Modified fatigue impact scale                                   | 0, 10 weeks          | I: 13.17 (3.81)<br>C: 12.69 (3.89)   | I: 9.00 (3.75)<br>C: 12.88 (3.89)    | Yes |
| Trompetter, 2015                                               | Mindfulness skills                               | Five Facet Mindfulness Questionnaire-Short Form                 | 0, 3 months          | I: 81.4 (10.7)<br>C: 80.4 (10.7)     | I: 86.7 (12.2)<br>C: 83.3 (11.7)     | No  |
|                                                                | Avoidance of pain and cognitive fusion with pain | Psychological Inflexibility in Pain Scale                       | 0, 3 months          | I: 55.0 (11.6)<br>C: 54.5 (11.6)     | I: 40.7 (13.8)<br>C: 48.8 (13.1)     | Yes |
|                                                                | Pain catastrophizing                             | Pain Catastrophizing Scale                                      | 0, 3 months          | I: 18.6 (9.5)<br>C: 19.1 (9.6)       | I: 13.5 (11.3)<br>C: 17.8 (11.0)     | Yes |
| Van der Weegen, 2015                                           | General self-efficacy                            | General Self-Efficacy Scale                                     | 0, post-intervention | I: 3.2 (0.5)<br>C: 3.1 (0.5)         | I: 3.3 (0.4)<br>C: 3.2 (0.4)         | No  |
|                                                                | Exercise self-efficacy                           | Exercise Self-Efficacy Scale                                    | 0, post-intervention | I: 55.4 (17.0)<br>C: 54.0 (19.2)     | I: 59.7 (17.3)<br>C: 54.5 (17.4)     | No  |
| <b>Dealing with the chronic condition: behavioral measures</b> |                                                  |                                                                 |                      |                                      |                                      |     |
| Buhrman, 2004                                                  | Coping strategy: Increase activity level         | Coping Strategy Questionnaire: subscale increase activity level | 0, 8 weeks           | I: 14.4 (5.0)<br>C: 17.3 (6.1)       | I: 14.8 (5.6)<br>C: 16.9 (6.3)       | No  |
|                                                                | Pain interference with daily activities          | Multidimensional Pain Inventory: subscale pain interference     | 0, 8 weeks           | I: 3.6 (1.2)<br>C: 3.9 (1.3)         | I: 3.2 (1.4)<br>C: 3.5 (1.2)         | No  |
| Buhrman, 2011                                                  | Coping strategy:                                 | Coping Strategy Questionnaire:                                  | 0, 12 weeks          | I: 16.0 (6.0)<br>C: 15.6 (4.5)       | I: 14.3 (5.4)<br>C: 15.9 (5.7)       | No  |

|               |                                                                                               |                                                                       |             |                                      |                                      |     |
|---------------|-----------------------------------------------------------------------------------------------|-----------------------------------------------------------------------|-------------|--------------------------------------|--------------------------------------|-----|
|               | Increase activity level                                                                       | subscale increase activity level                                      |             |                                      |                                      |     |
|               | Pain interference with daily activities                                                       | Multidimensional Pain Inventory: subscale pain interference           | 0, 12 weeks | I: 3.6 (1.2)<br>C: 3.9 (1.3)         | I: 3.2 (1.4)<br>C: 3.5 (1.2)         | No  |
| Buhrman, 2013 | Coping Strategy: Increase activity level                                                      | Coping Strategy Questionnaire: subscale increase activity level       | 0, 8 weeks  | I: 16.32 (6.41)<br>C: 16.05 (5.15)   | I: 15.76 (5.56)<br>C: 18.07 (4.60)   | No  |
|               | Coping Strategy: Pain behavior                                                                | Coping Strategy Questionnaire: subscale pain behavior                 | 0, 8 weeks  | I: 18.26 (4.85)<br>C: 18.71 (4.67)   | I: 18.07 (4.60)<br>C: 18.69 (5.39)   | No  |
|               | Coping Strategy: the extent to which a person follows their activities regardless of pain     | Chronic pain acceptance questionnaire: subscale activities engagement | 0, 8 weeks  | I: 22.84 (11.02)<br>C: 21.18 (9.70)  | I: 28.62 (11.15)<br>C: 22.22 (11.17) | Yes |
|               | Coping Strategy: the extent to which a person believes that avoiding activities prevents pain | Chronic pain acceptance questionnaire: subscale pain willingness      | 0, 8 weeks  | I: 18.13 (8.85)<br>C: 20.61 (8.68)   | I: 23.53 (8.32)<br>C: 21.53 (7.94)   | Yes |
|               | Pain interference with daily activities                                                       | Multidimensional Pain Inventory: subscale pain interference           | 0, 8 weeks  | I: 4.76 (0.88)<br>C: 4.85 (0.89)     | I: 4.37 (1.09)<br>C: 4.94 (0.93)     | Yes |
|               |                                                                                               |                                                                       |             |                                      |                                      |     |
| Buhrman, 2015 | Coping Strategy: Increase activity level                                                      | Coping Strategy Questionnaire: subscale increase activity level       | 0, 8 weeks  | I: 14.93 (5.13)<br>C: 15.92 (5.23)   | I: 16.40 (5.69)<br>C: 15.76 (5.07)   | No  |
|               | Coping Strategy: Pain behavior                                                                | Coping Strategy Questionnaire: subscale pain behavior                 | 0, 8 weeks  | I: 17.07 (5.00)<br>C: 17.67 (4.14)   | I: 17.64 (5.38)<br>C: 18.33 (5.50)   | No  |
|               | Coping Strategy: the extent to which a person follows their activities regardless of          | Chronic pain acceptance questionnaire: subscale activities engagement | 0, 8 weeks  | I: 38.00 (11.45)<br>C: 38.54 (11.68) | I: 45.11 (12.03)<br>C: 40.37 (9.16)  | Yes |

|                           |                                                                                                |                                                                  |                      |                                    |                                    |     |
|---------------------------|------------------------------------------------------------------------------------------------|------------------------------------------------------------------|----------------------|------------------------------------|------------------------------------|-----|
|                           | pan                                                                                            |                                                                  |                      |                                    |                                    |     |
|                           | Coping Strategy: the extent to which a person believes that avoiding activities prevents pain  | Chronic pain acceptance questionnaire: subscale pain willingness | 0, 8 weeks           | I: 30.46 (8.00)<br>C: 31.58 (7.76) | I: 34.73 (7.15)<br>C: 32.38 (5.72) | No  |
|                           | Pain interference with daily activities                                                        | Multidimensional Pain Inventory: subscale pain interference      |                      | I: 3.91 (1.20)<br>C: 4.14 (1.03)   | I: 3.31 (1.29)<br>C: 3.80 (1.21)   | No  |
| Ferwerda, 2017            | Compliance to standard rheumatological care                                                    | 5-point Likert scales for rheumatologic care                     | 0, post-intervention | I: 4.15 (0.92)<br>C: 4.20 (0.89)   | I: 4.43 (0.67)<br>C: 4.28 (0.71)   | No  |
| Friessen, 2017            | Pain interference with daily activities                                                        | Brief Pain Inventory: subscale interference                      | 0, 8 weeks           | I: 6.56 (1.90)<br>C: 7.48 (1.71)   | I: 5.46 (2.11)<br>C: 7.32 (1.58)   | No  |
| Van der Meer, 2009        | Adequacy of asthma control                                                                     | Asthma Control Questionnaire                                     | 0, 12 months         | I: 1.12 (NM)<br>C: 1.11 (NM)       | I: 0.59 (NM)<br>C: 1.04 (NM)       | Yes |
| Torbjørnsen, 2014         | Self-management: skills and technique acquisition                                              | Hei-Q                                                            | 0, 4 months          | I: 2.87 (0.43)<br>C: 2.92 (0.34)   | I: 3.04 (0.52)<br>C: 2.92 (0.56)   | Yes |
|                           | Self-management: Health service navigation                                                     | Hei-Q                                                            | 0, 4 months          | I: 3.08 (0.43)<br>C: 3.13 (0.40)   | I: 3.27 (0.56)<br>C: 3.20 (0.54)   | Yes |
| Trompetter, 2015          | Awareness of personal values and the degree to which this guide person's actions in daily life | Engaged Living Scale                                             | 0, 3 months          | I: 51.5 (10.4)<br>C: 49.8 (9.1)    | I: 55.1 (12.4)<br>C: 52.8 (11.8)   | No  |
|                           | Pain interference with daily activities                                                        | Multidimensional Pain Inventory: subscale pain interference      | 0, 3 months          | I: 32.3 (9.8)<br>C: 33.3 (9.8)     | I: 28.7 (12.0)<br>C: 32.1 (11.5)   | No  |
| <b>Emotional outcomes</b> |                                                                                                |                                                                  |                      |                                    |                                    |     |
| Buhrman, 2004             | Anxiety                                                                                        | Hospital Anxiety and Depression Scale                            | 0, 8 weeks           | I: 7.4 (4.5)<br>C: 7.0 (3.3)       | I: 7.2 (4.0)<br>C: 6.0 (3.3)       | No  |

|                                       |                    |                                                              |                      |                                    |                                    |     |
|---------------------------------------|--------------------|--------------------------------------------------------------|----------------------|------------------------------------|------------------------------------|-----|
|                                       | Depression         | Hospital Anxiety and Depression Scale                        | 0, 8 weeks           | I: 6.9 (4.8)<br>C: 6.6 (4.1)       | I: 6.0 (4.7)<br>C: 5.4 (4.0)       | No  |
|                                       | Affective distress | Multidimensional Pain Inventory: subscale affective distress | 0, 8 weeks           | I: 2.9 (0.9)<br>C: 3.0 (0.6)       | I: 2.8 (0.9)<br>C: 3.1 (0.6)       | No  |
| Buhrman, 2011                         | Anxiety            | Hospital Anxiety and Depression Scale                        | 0, 12 weeks          | I: 7.6 (3.7)<br>C: 7.6 (5.1)       | I: 5.8 (3.5)<br>C: 7.0 (6.0)       | No  |
|                                       | Depression         | Hospital Anxiety and Depression Scale                        | 0, 12 weeks          | I: 6.3 (4.2)<br>C: 6.3 (4.5)       | I: 4.9 (3.6)<br>C: 6.3 (5.2)       | No  |
|                                       | Affective distress | Multidimensional Pain Inventory: subscale affective distress | 0, 12 weeks          | I: 2.9 (0.9)<br>C: 3.0 (0.6)       | I: 2.8 (0.9)<br>C: 3.1 (0.6)       | No  |
| Buhrman, 2013                         | Anxiety            | Hospital Anxiety and Depression Scale                        | 0, 8 weeks           | I: 9.89 (4.19)<br>C: 9.13 (4.26)   | I: 8.97 (4.33)<br>C: 9.67 (3.50)   | Yes |
|                                       | Depression         | Hospital Anxiety and Depression Scale                        | 0, 8 weeks           | I: 9.58 (4.57)<br>C: 9.63 (4.04)   | I: 8.85 (4.40)<br>C: 10.52 (3.77)  | Yes |
|                                       | Affective distress | Multidimensional Pain Inventory: subscale affective distress | 0, 8 weeks           | I: 3.32 (0.78)<br>C: 3.14 (0.73)   | I: 3.08 (0.74)<br>C: 3.31 (0.64)   | Yes |
| Buhrman, 2015                         | Anxiety            | Beck Anxiety Inventory                                       | 0, 8 weeks           | I: 20.36 (9.54)<br>C: 17.83 (7.56) | I: 11.99 (8.13)<br>C: 14.57 (6.81) | Yes |
|                                       | Depression         | Montgomery Asberg Depression Rating Scale                    | 0, 8 weeks           | I: 23.14 (6.94)<br>C: 20.83 (6.19) | I: 15.77 (7.79)<br>C: 17.95 (6.51) | Yes |
|                                       | Affective distress | Multidimensional Pain Inventory: subscale affective distress | 0, 8 weeks           | I: 3.25 (0.61)<br>C: 3.26 (0.81)   | I: 3.17 (0.56)<br>C: 3.31 (0.64)   | No  |
| Dear, 2015<br>*regular contact group  | Depression         | Patient Health Questionnaire 9-item                          | 0, 8 weeks           | I: 11.55 (5.88)<br>C: 10.37 (5.47) | I: 6.30 (4.57)<br>C: 11.11 (5.51)  | Yes |
|                                       | Anxiety            | Generalized Anxiety Disorder 7-item                          | 0, 8 weeks           | I: 8.40 (5.52)<br>C: 8.21 (5.92)   | I: 4.91 (4.40)<br>C: 7.89 (5.29)   | Yes |
| Dear, 2015<br>*optional contact group | Depression         | Patient Health Questionnaire 9-item                          | 0, 8 weeks           | I: 10.60 (5.33)<br>C: 10.37 (5.47) | I: 7.20 (5.25)<br>C: 11.11 (5.51)  | Yes |
|                                       | Anxiety            | Generalized Anxiety Disorder 7-item                          | 0, 8 weeks           | I: 7.98 (4.67)<br>C: 8.21 (5.92)   | I: 5.66 (4.94)<br>C: 7.89 (5.29)   | Yes |
| Ferwerda, 2016                        | Depression         | Beck Depression Inventory                                    | 0, post-intervention | I: 11.53 (6.99)<br>C: 13.38 (6.46) | I: 8.16 (5.67)<br>C: 12.27 (5.97)  | Yes |

|                   |                              |                                                              |                      |                                      |                                      |     |
|-------------------|------------------------------|--------------------------------------------------------------|----------------------|--------------------------------------|--------------------------------------|-----|
|                   | Negative mood                | Impact of Rheumatic Diseases on General Health and Lifestyle | 0, post-intervention | I: 4.07 (2.56)<br>C: 5.42 (4.21)     | I: 3.25 (2.39)<br>C: 4.95 (4.17)     | Yes |
|                   | Anxiety                      | Impact of Rheumatic Diseases on General Health and Lifestyle | 0, post-intervention | I: 20.82 (4.85)<br>C: 21.40 (4.85)   | I: 18.12 (4.13)<br>C: 20.61 (4.99)   | Yes |
| Friessen, 2017    | Anxiety                      | Generalized Anxiety Disorder 7-item (GAD7)                   | 0, 8 weeks           | I: 10.87 (4.65)<br>C: 9.93 (4.88)    | I: 7.83 (5.70)<br>C: 9.98 (5.15)     | Yes |
|                   | Depression                   | Patient Health Questionnaire 9-item (PHQ9)                   | 0, 8 weeks           | I: 14.07 (4.66)<br>C: 14.07 (4.93)   | I: 10.13 (5.30)<br>C: 14.00 (5.44)   | Yes |
|                   | Anxiety                      | Hospital Anxiety and Depression Scale                        | 0, 8 weeks           | I: 11.60 (4.00)<br>C: 10.17 (3.98)   | I: 9.22 (4.33)<br>C: 10.43 (4.69)    | Yes |
|                   | Depression                   | Hospital Anxiety and Depression Scale                        | 0, 8 weeks           | I: 9.90 (3.37)<br>C: 9.97 (3.82)     | I: 7.97 (3.55)<br>C: 10.17 (3.42)    | Yes |
| Hunt, 2009        | Anxiety                      | Anxiety Sensitivity Index                                    | 0, 5 weeks           | I: 2.9 (0.91)<br>C: 2.7 (0.99)       | I: 1.9 (0.93)<br>C: 2.5 (0.95)       | Yes |
| Jasper, 2014      | Tinnitus associated distress | Mini-Tinnitus Questionnaire                                  | 0, 10 weeks          | I: 12.20 (4.58)<br>C: 12.50 (4.83)   | I: 7.44 (5.30)<br>C: 11.09 (5.77)    | Yes |
|                   | Tinnitus associated distress | Tinnitus Handicap Inventory                                  | 0, 10 weeks          | I: 40.34 (17.64)<br>C: 40.23 (20.54) | I: 26.67 (20.75)<br>C: 37.46 (18.94) | Yes |
|                   | Anxiety                      | Hospital Anxiety and Depression Scale                        | 0, 10 weeks          | I: 7.41 (3.56)<br>C: 8.00 (4.24)     | I: 5.44 (3.23)<br>C: 7.67 (4.68)     | Yes |
|                   | Depression                   | Hospital Anxiety and Depression Scale                        | 0, 10 weeks          | I: 5.95 (4.21)<br>C: 6.43 (4.48)     | I: 4.41 (3.72)<br>C: 5.88 (4.41)     | No  |
| Moss Morris, 2012 | Anxiety                      | Hospital Anxiety and Depression Scale                        | 0, 10 weeks          | I: 8.26 (4.31)<br>C: 9.56 (4.50)     | I: 6.44 (3.91)<br>C: 11.65 (5.26)    | Yes |
|                   | Depression                   | Hospital Anxiety and Depression Scale                        | 0, 10 weeks          | I: 7.96 (3.64)<br>C: 6.75 (2.72)     | I: 5.18 (3.38)<br>C: 8.73 (3.62)     | Yes |
| Steel, 2016       | Depression                   | Center for Epidemiologic Studies Depression Scale            | 0, 6 months          | I: 25.9 (9.8)<br>C: 25.49 (6.9)      | I: 15.3 (10.5)<br>C: 24.7 (15.1)     | No  |
| Trompetter, 2015  | Anxiety                      | Hospital Anxiety and Depression Scale                        | 0, 3 months          | I: 7.2 (3.3)<br>C: 6.9 (3.3)         | I: 6.0 (3.8)<br>C: 6.1 (3.6)         | No  |

|                        |                                                                                  |                                              |                      |                                      |                                      |     |
|------------------------|----------------------------------------------------------------------------------|----------------------------------------------|----------------------|--------------------------------------|--------------------------------------|-----|
|                        | Depression                                                                       | Hospital Anxiety and Depression Scale        | 0, 3 months          | I: 6.1 (3.4)<br>C: 6.1 (3.4)         | I: 5.1 (3.7)<br>C: 5.8 (3.5)         | No  |
|                        | Positive mental health                                                           | Mental Health Continuum-Short Form           | 0, 3 months          | I: 52.6 (11.8)<br>C: 49.9 (12.8)     | I: 54.7 (12.2)<br>C: 52.6 (14.3)     | No  |
| Van Beugen, 2016       | Negative mood                                                                    | Impact of chronic Skin Disease on Daily Life | 0, post-treatment    | I: 5.29 (3.77)<br>C: 5.39 (3.72)     | I: 3.69 (3.36)<br>C: 4.60 (3.21)     | No  |
|                        | Anxiety                                                                          | Impact of chronic Skin Disease on Daily Life | 0, post-treatment    | I: 21.85 (4.61)<br>C: 22.10 (4.58)   | I: 19.36 (4.37)<br>C: 21.02 (5.74)   | No  |
|                        | Depression                                                                       | Beck Depression Inventory                    | 0, post-treatment    | I: 12.78 (7.50)<br>C: 11.50 (6.23)   | I: 8.46 (5.34)<br>C: 8.89 (6.82)     | No  |
| <b>Quality of life</b> |                                                                                  |                                              |                      |                                      |                                      |     |
| Buhrman, 2011          | Generic quality of life                                                          | Quality Of Life Inventory                    | 0, 12 weeks          | I: 1.2 (1.4)<br>C: 1.8 (1.5)         | I: 1.7 (1.4)<br>C: 1.1 (1.6)         | Yes |
| Buhrman, 2013          | Generic quality of life                                                          | Quality Of Life Inventory                    | 0, 8 weeks           | I: 0.26 (2.18)<br>C: 0.15 (1.97)     | I: 0.56 (2.07)<br>C: 0.39 (1.77)     | No  |
| Buhrman, 2015          | Generic quality of life                                                          | Quality of Life Inventory                    | 0, 8 weeks           | I: 0.65 (1.65)<br>C: 0.70 (1.39)     | I: 1.38 (1.78)<br>C: 1.39 (1.59)     | No  |
| Dlugonski, 2012        | Multiple Sclerosis-specific health related quality of life: physical impact      | Multiple Sclerosis Impact Scale              | 0, 12 weeks          | I: 44.3 (19.8)<br>C: 38.3 (19.0)     | I: 44.8 (21.2)<br>C: 41.1 (20.6)     | No  |
|                        | Multiple Sclerosis-specific health related quality of life: psychological impact | Multiple Sclerosis Impact Scale              | 0, 12 weeks          | I: 20.0 (8.2)<br>C: 18.5 (8.0)       | I: 19.5 (7.9)<br>C: 19.6 (9.2)       | No  |
| Ferwerda, 2017         | Health related quality of life: Role impairment (physical)                       | RAND-36 subscale Role impairment (physical)  | 0, post-intervention | I: 39.58 (39.94)<br>C: 26.49 (38.65) | I: 48.91 (45.02)<br>C: 33.19 (39.84) | No  |
|                        | Health related quality of life: Role impairment (emotional)                      | RAND-36 subscale Role impairment (emotional) | 0, post-intervention | I: 69.44 (39.91)<br>C: 58.82 (46.47) | I: 83.33 (28.76)<br>C: 62.15 (45.26) | Yes |
| Friessen, 2017         | Quality of life, physical component                                              | Medical Outcomes Study Short Form (SF 12)    | 0, 8 weeks           | I: 30.81 (7.82)<br>C: 32.17 (7.35)   | I: 34.70 (7.94)<br>C: 32.82 (8.20)   | Yes |

|                      |                                                             |                                                     |                      |                                      |                                      |     |
|----------------------|-------------------------------------------------------------|-----------------------------------------------------|----------------------|--------------------------------------|--------------------------------------|-----|
|                      | Quality of life, mental component                           | Medical Outcomes Study Short Form (SF 12)           | 0, 8 weeks           | I: 34.42 (8.52)<br>C: 36.12 (7.60)   | I: 39.62 (11.22)<br>C: 38.95 (9.16)  | No  |
| Hunt, 2009           | Irritable bowel-specific health related quality of life     | Irritable Bowel Syndrome Quality of Life Impairment | 0, 5 weeks           | I: 122 (27)<br>C: 84 (26)            | I: 123 (26)<br>C: 111 (25)           | Yes |
| Ljotsson, 2011       | Irritable bowel-specific health related quality of life     | Irritable Bowel Syndrome Quality of Life Instrument | 0, 10 weeks          | I: 67.4 (20.9)<br>C: 76.1 (18.8)     | I: 82.6 (13.4)<br>C: 67.4 (23.1)     | Yes |
| Van Beugen, 2016     | Health related quality of life: Role impairment (physical)  | RAND-36 subscale Role impairment (physical)         | 0, post-intervention | I: 53.02 (41.90)<br>C: 58.89 (43.09) | I: 72.09 (36.68)<br>C: 73.94 (40.03) | Yes |
|                      | Health related quality of life: Role impairment (emotional) | RAND-36 subscale Role impairment (emotional)        | 0, post-intervention | I: 78.16 (35.07)<br>C: 67.54 (39.89) | I: 86.6 (23.09)<br>C: 76.09 (38.27)  | No  |
| Van der Meer 2009    | Asthma-specific health related quality of life              | Asthma Quality of Life Questionnaire                | 0, 12 months         | I: 5.73 (NM)<br>C: 5.79 (NM)         | I: 6.29 (NM)<br>C: 5.97 (NM)         | Yes |
| Van der Weegen, 2015 | Health related quality of life: Role impairment (physical)  | RAND-36 subscale Role impairment (physical)         | 0, post-intervention | I: 42.5 (11.1)<br>C: 45.8 (9.4)      | I: 45.2 (9.5)<br>C: 47.0 (10.0)      | No  |
|                      | Health related quality of life: Role impairment (emotional) | RAND-36 subscale Role impairment (emotional)        | 0, post-intervention | I: 48.2 (10.3)<br>C: 50.1 (9.5)      | I: 48.8 (10.6)<br>C: 47.7 (9.8)      | Yes |
| Steel, 2016          | Cancer-specific health related quality of life              | Functional Assessment of Cancer Therapy-General     | 0, 6 months          | I: 67.2 (17.1)<br>C: 65.8 (16.9)     | I: 82.4 (15.2)<br>C: 63.2 (21.5)     | Yes |
