# Supplementary material for: Blended Interventions to Change Behavior in Patients With Chronic Somatic Disorders: Systematic Review
Source: PubMed Central journal article supplement (PMC5754569; doi:10.2196/jmir.8108), 2017-12-21
Supplement: jmir_v19i12e418_app5.pdf [file jmir_v19i12e418_app5.pdf]

| Author, year of publication               | Outcome measure            | Instrument                                                             | Time of measurement (pre- and post-treatment) | Pre-treatment mean (SD)            | Post-treatment mean (SD)          | Significant effect |
|-------------------------------------------|----------------------------|------------------------------------------------------------------------|-----------------------------------------------|------------------------------------|-----------------------------------|--------------------|
| <b>Symptoms and signs</b>                 |                            |                                                                        |                                               |                                    |                                   |                    |
| Allen, 2013<br>*intensive counseling      | Body weight                | Weighing scale                                                         | 0, 6 months                                   | I: 100.3 (16.5)<br>C: 96.4 (16.9)  | I: 94.9 (4.0)<br>C: 94.6 (3.7)    | No                 |
|                                           | BMI                        | Scale and meter                                                        | 0, 6 months                                   | I: 34.3 (3.9)<br>C: 35.3 (4.1)     | I: 32.5 (1.3)<br>C: 34.7 (1.3)    | No                 |
|                                           | Male waist circumference   | Measuring tape                                                         | 0, 6 months                                   | I: 119.4 (11.6)<br>C: 113.8 (23.0) | I: 112.4 (2.6)<br>C: 110.4 (8.3)  | No                 |
|                                           | Female waist circumference | Measuring tape                                                         | 0, 6 months                                   | I: 109.7 (11.4)<br>C: 105.5 (11.1) | I: 104.0 (3.7)<br>C: 110.4 (8.3)  | No                 |
| Allen, 2013<br>*less intensive counseling | Body weight                | Weighing scale                                                         | 0, 6 months                                   | I: 96.8 (14.8)<br>C: 96.4 (16.9)   | I: 93.5 (5.9)<br>C: 94.6 (3.7)    | No                 |
|                                           | BMI                        | Scale and meter                                                        | 0, 6 months                                   | I: 33.5 (3.5)<br>C: 35.3 (4.1)     | I: 32.4 (2.0)<br>C: 34.7 (1.3)    | No                 |
|                                           | Male waist circumference   | Measuring tape                                                         | 0, 6 months                                   | I: 116.4 (4.6)<br>C: 113.8 (23.0)  | I: 109.9 (0.35)<br>C: 110.4 (8.3) | No                 |
|                                           | Female waist circumference | Measuring tape                                                         | 0, 6 months                                   | I: 108.7 (8.4)<br>C: 105.5 (11.1)  | I: 105.1 (7.9)<br>C: 110.4 (8.3)  | No                 |
| Dear, 2015<br>*regular contact group      | Average pain               | Wilcinson Brief Pain Questionnaire                                     | 0, 8 weeks                                    | I: 5.74 (1.72)<br>C: 5.72 (1.63)   | I: 4.86 (1.79)<br>C: 5.20 (1.80)  | No                 |
| Dear, 2015<br>*optional contact group     | Average pain               | Wilcinson Brief Pain Questionnaire                                     | 0, 8 weeks                                    | I: 5.54 (1.74)<br>C: 5.72 (1.63)   | I: 4.85 (1.73)<br>C: 5.20 (1.80)  | No                 |
| Glasgow, 2010                             | BMI                        | Scale and meter                                                        | 0, 4 months                                   | I: 35.2 (6.78)<br>C: 34.5 (6.28)   | I: 35.1 (6.83)<br>C: 34.4 (6.27)  | Yes                |
|                                           | Hemoglobin                 | Bio-Rad Variant II Turbo liquid by high pressure liquid chromatography | 0, 4 months                                   | I: 8.26 (1.75)<br>C: 8.01 (1.85)   | I: 8.05 (1.48)<br>C: 7.84 (1.67)  | No                 |
|                                           | Lipid ratio (total / HDL)  | Modular chemistry analyzer, Abell Kendall method                       | 0, 4 months                                   | I: 4.04 (1.11)<br>C: 4.00 (1.25)   | I: 3.94 (1.16)<br>C: 3.84 (1.06)  | No                 |

|                                           |                                                    |                                             |              |                                       |                                      |     |
|-------------------------------------------|----------------------------------------------------|---------------------------------------------|--------------|---------------------------------------|--------------------------------------|-----|
|                                           | Mean arterial blood pressure                       | Blood pressure meter                        | 0, 4 months  | I: 95.12 (10.54)<br>C: 95.42 (10.40)  | I: 94.58 (10.50)<br>C: 94.27 (10.20) | No  |
| Torbjørnsen, 2014                         | Hemoglobin                                         | Blood test                                  | 0, 4 months  | I: 8.2 (1.08)<br>C: 8.1 (1.09)        | I: 7.8 (1.44)<br>C: 7.8 (0.91)       | No  |
| Trompetter, 2015                          | Pain                                               | Pain NRS                                    | 0, 3 months  | I: 6.3 (1.6)<br>C: 6.1 (1.6)          | I: 5.4 (2.2)<br>C: 5.9 (2.3)         | Yes |
| Van den Berg, 2006                        | Disease activity: pain, swelling and tenderness    | Reumatoid Arthritis Disease Activity: DAS28 | 0, 12 months | I: 3.5 (2.3)<br>C: 3.3 (2.1)          | I: 3.1 (1.6)<br>C: 2.8 (2.0)         | No  |
| Yardley, 2014<br>*basic nurse support     | Body weight                                        | Weighing scale                              | 0, 6 months  | I: 103.43 (25.23)<br>C: 98.25 (18.11) | I: 97.92 (5.80)<br>C: 99.00 (5.75)   | No  |
| Yardley, 2014<br>*regular nurse support   | Body weight                                        | Weighing scale                              | 0, 6 months  | I: 100.36 (19.38)<br>C: 98.25 (18.11) | I: 97.14 (5.74)<br>C: 99.00 (5.75)   | No  |
| <b>Daily activity related limitations</b> |                                                    |                                             |              |                                       |                                      |     |
| Allen, 2013<br>* intensive counseling     | Self-reported activity                             | Stanford 7-Day Physical Activity Recall     | 0, 6 months  | I:4.9 (5.7)<br>C:3.5 (3.7)            | I: 2.9 (5.4)<br>C:3.3 (5.1)          | No  |
| Allen, 2013<br>*less intensive counseling | Self-reported activity                             | Stanford 7-Day Physical Activity Recall     | 0, 6 months  | I: 5.3 (5.4)<br>C:3.5 (3.7)           | I:1.7 (5.5)<br>C:3.3 (5.1)           | No  |
| Van den Berg, 2006                        | Functional ability                                 | MACTAR                                      | 0, 12 months | I: 51.0 (4.0)<br>C: 50.0 (4.0)        | I: 55.2 (8.1)<br>C: 52.5 (10.1)      | Yes |
|                                           | Rheumatoid related disabilities                    | Health Assessment Questionnaire             | 0, 12 months | I: 0.75 (1.13)<br>C: 0.75 (0.75)      | I: 0.66 (0.35)<br>C: 0.71 (0.16)     | Yes |
| Dear, 2015<br>*regular contact group      | Backpain associated disability in daily activities | Roland-Morris Disability Questionnaire      | 0, 8 weeks   | I: 13.47 (5.23)<br>C: 13.92 (5.06)    | I: 11.05 (5.63)<br>C: 11.36 (5.22)   | No  |
| Dear, 2015<br>*optional                   | Backpain associated                                | Roland-Morris Disability                    | 0, 8 weeks   | I: 13.24 (5.60)<br>C: 13.92 (5.06)    | I: 10.95 (.84)<br>C: 11.36 (5.22)    | No  |

|                                                               |                                                |                                                                                              |              |                                      |                                      |     |
|---------------------------------------------------------------|------------------------------------------------|----------------------------------------------------------------------------------------------|--------------|--------------------------------------|--------------------------------------|-----|
| contact group                                                 | disability in daily activities                 | Questionnaire                                                                                |              |                                      |                                      |     |
| Glasgow, 2010                                                 | Physical activity                              | CHAMPS instrument                                                                            | 0, 4 months  | I: 3664 (2959)<br>C: 4294 (3054)     | I: 3697 (3272)<br>C: 4146 (3578)     | No  |
| Liebreich, 2009                                               | Leisure-time Physical activity                 | Modified version Godin Leisure-Time Exercise Questionnaire                                   | 0, 3 months  | I: 483 (620)<br>C: 501 (582)         | I: 654 (659)<br>C: 490 (562)         | Yes |
| McKay, 2001                                                   | Moderate-to-vigorous exercise                  | Behavioral Risk Factor Surveillance system                                                   | 0, 2 months  | I: 5.6 (6.2)<br>C: 7.3 (6.2)         | I: 17.6 (15.3)<br>C: 18.0 (17.3)     | No  |
|                                                               | Walking                                        | Behavioral Risk Factor Surveillance system                                                   | 0, 2 months  | I: 6.4 (6.2)<br>C: 8.4 (8.4)         | I: 12.5 (9.5)<br>C: 16.8 (22.8)      | No  |
| Van den Berg, 2006                                            | Meeting physical activity recommendations      | Self-reported, percentage of total sample                                                    | 0, 12 months | I: 0 (0)<br>C: 0 (0)                 | I: 19 (26)<br>C: 11 (15)             | No  |
|                                                               | Physical activity score                        | Number of acceleration per 5-minute period throughout the day, Actilog V3.0 activity monitor | 0, 12 months | I: 72.0 (33.5)<br>C: 79.0 (25.8)     | I: 72.3 (34.0)<br>C: 80.7 (30.6)     | No  |
| Trompetter, 2015                                              | Disruption of daily activities by chronic pain | Pain Disability Index                                                                        | 0, 3 months  | I: 36.0 (12.7)<br>C: 36.4 (12.7)     | I: 30.6 (14.5)<br>C: 34.6 (14.3)     | No  |
| <b>Dealing with the chronic condition: cognitive measures</b> |                                                |                                                                                              |              |                                      |                                      |     |
| Dear, 2015<br>*regular contact group                          | Pain Self-efficacy                             | Pain Self-efficacy Questionnaire                                                             | 0, 8 weeks   | I: 28.86 (12.93)<br>C: 26.80 (11.52) | I: 35.94 (12.98)<br>C: 33.21 (11.97) | Yes |
|                                                               | Fear of movement                               | TAMPA Scale of Kinesiophobia                                                                 | 0, 8 weeks   | I: 38.59 (7.99)<br>C: 39.35 (7.37)   | I: 34.48 (7.00)<br>C: 34.59 (6.80)   | No  |
|                                                               | Pain acceptance                                | Chronic Pain Acceptance                                                                      | 0, 8 weeks   | I: 22.58 (7.53)<br>C: 22.26 (7.19)   | I: 26.79 (6.69)<br>C: 25.76 (6.65)   | No  |

|                                          |                                                                                                |                                                                                                                |             |                                         |                                         |    |
|------------------------------------------|------------------------------------------------------------------------------------------------|----------------------------------------------------------------------------------------------------------------|-------------|-----------------------------------------|-----------------------------------------|----|
|                                          |                                                                                                | Questionnaire                                                                                                  |             |                                         |                                         |    |
| Dear, 2015<br>*optional<br>contact group | Pain Self-<br>efficacy                                                                         | Pain Self-<br>efficacy<br>Questionnaire                                                                        | 0, 8 weeks  | I: 28.61 (14.08)<br>C: 26.80<br>(11.52) | I: 33.60 (13.83)<br>C: 33.21<br>(11.97) | No |
|                                          | Fear of<br>movement                                                                            | TAMPA Scale of<br>Kinesiophobia                                                                                | 0, 8 weeks  | I: 37.60 (8.40)<br>C: 39.35 (7.37)      | I: 34.88 (7.80)<br>C: 34.59 (6.80)      | No |
|                                          | Pain<br>acceptance                                                                             | Chronic Pain<br>Acceptance<br>Questionnaire                                                                    | 0, 8 weeks  | I: 23.30 (7.72)<br>C: 22.26 (7.19)      | I: 25.40 (8.01)<br>C: 25.76 (6.65)      | No |
| Liebreich, 2009                          | Self-efficacy in<br>performing<br>regular physical<br>activity                                 | Self-efficacy<br>12-item scale,<br>Plotnikoff et al.                                                           | 0, 3 months | I: 3.00 (0.74)<br>C: 3.01 (0.71)        | I: 2.99 (0.84)<br>C: 2.82 (0.84)        | No |
|                                          | Outcome<br>expectations of<br>engaging in<br>physical<br>activity                              | Modified<br>version of the<br>Decisional<br>Balance Scale<br>and Physical<br>Activity<br>Expectations<br>Scale | 0, 3 months | I: 4.66 (0.87)<br>C: 4.62 (0.37)        | I: 4.57 (0.54)<br>C: 4.57 (0.42)        | No |
|                                          | The perceived<br>importance of<br>outcome<br>expectations                                      | Perceived<br>importance of<br>the Outcome<br>Expectations                                                      | 0, 3 months | I: 2.73 (0.29)<br>C: 2.71 (0.34)        | I: 2.69 (0.39)<br>C: 2.65 (0.36)        | No |
|                                          | The degree to<br>which<br>participants<br>rewarded<br>themselves and<br>set realistic<br>goals | Reinforcement<br>4-item scale,<br>Marcus et al.                                                                | 0, 3 months | I: 2.73 (0.66)<br>C: 2.58 (0.84)        | I: 2.83 (0.74)<br>C: 2.70 (0.91)        | No |
|                                          | Emotional<br>coping<br>response                                                                | Emotional well-<br>being subscale                                                                              | 0, 3 months | I: 2.93 (0.76)<br>C: 2.78 (0.67)        | I: 2.90 (0.67)<br>C: 2.90 (0.67)        | No |
|                                          | Participants'ind<br>ication of how<br>true a variety                                           | Subscale of<br>Behavior<br>Regulation in                                                                       | 0, 3 months | I: 3.81 (0.54)<br>C: 3.94 (0.53)        | I: 3.56 (0.91)<br>C: 3.75 (1.05)        | No |

|                  |                                                                                                             |                                                        |             |                                  |                                  |     |
|------------------|-------------------------------------------------------------------------------------------------------------|--------------------------------------------------------|-------------|----------------------------------|----------------------------------|-----|
|                  | of reasons to exercise were (e.g. 'I value the benefits of exercise')                                       | Exercise Questionnaire                                 |             |                                  |                                  |     |
|                  | Experienced confidence in performing physical activity                                                      | Behavioral capacity 4-item scale, Rogers et al.        | 0, 3 months | I: 3.10 (1.18)<br>C: 3.25 (0.98) | I: 3.23 (1.32)<br>C: 2.97 (0.98) | Yes |
|                  | Indication of how often external situations prevented participants from getting a physical active lifestyle | Situation 17-item scale, Rogers et al.                 | 0, 3 months | I: 2.41 (0.66)<br>C: 2.11 (0.55) | I: 2.35 (0.67)<br>C: 2.16 (0.59) | No  |
|                  | Experienced social support in getting a physical active lifestyle                                           | Social support 2-item scale, Cournya et al.            | 0, 3 months | I: 5.06 (1.52)<br>C: 4.58 (1.99) | I: 4.18 (2.10)<br>C: 4.27 (2.05) | No  |
|                  | The degree to which participants observed others being physical active                                      | Observational learning 2-item scale, Plotnikoff et al. | 0, 3 months | I: 4.14 (0.78)<br>C: 3.25 (0.98) | I: 3.96 (0.92)<br>C: 2.97 (0.98) | No  |
| Trompetter, 2015 | Positive mental health                                                                                      | Mental Health Continuum-Short Form                     | 0, 3 months | I: 52.6 (11.8)<br>C: 53.1 (11.8) | I: 54.7 (12.2)<br>C: 55.9 (15.2) | No  |
|                  | Avoidance of pain and cognitive fusion with                                                                 | Psychological Inflexibility in Pain Scale              | 0, 3 months | I: 55.0 (11.6)<br>C: 55.1 (11.6) | I: 40.7 (13.8)<br>C: 46.3 (14.1) | Yes |

|                                                                |                                                                                                |                                                 |             |                                     |                                    |     |
|----------------------------------------------------------------|------------------------------------------------------------------------------------------------|-------------------------------------------------|-------------|-------------------------------------|------------------------------------|-----|
|                                                                | pain                                                                                           |                                                 |             |                                     |                                    |     |
|                                                                | Mindfulness skills                                                                             | Five Facet Mindfulness Questionnaire-Short Form | 0, 3 months | I:81.4 (10.7)<br>C:83.2 (10.7)      | I:86.7 (12.2)<br>C: 88.8 (12.5)    | No  |
|                                                                | Pain catastrophizing                                                                           | Pain Catastrophizing Scale                      | 0, 3 months | I: 18.6 (9.5)<br>C: 17.6 (10.2)     | I: 13.5 (11.3)<br>C: 15.6 (11.7)   | No  |
| <b>Dealing with the chronic condition: behavioral measures</b> |                                                                                                |                                                 |             |                                     |                                    |     |
| Nobis, 2015                                                    | Coping with diabetes                                                                           | Acceptance and Action Diabetes Questionnaire    | 0, 2 months | I: 36.93 (8.96)<br>C: 36.56 (10.27) | I: 34.13 (8.45)<br>C: 36.11 (9.86) | Yes |
|                                                                | Diabetes specific self-management                                                              | Diabetes Self-Management Questionnaire          | 0, 2 months | I: 4.78 (0.65)<br>C:4.68 (0.65)     | I: 4.76 (0.55)<br>C: 4.72 (0.62)   | No  |
| Torbjørnsen, 2014                                              | Self-management: skills and technique acquisition                                              | Hei-Q                                           | 0, 4 months | I: 2.87 (0.43)<br>C: 2.95 (0.46)    | I: 3.04 (0.52)<br>C: 2.98 (0.62)   | No  |
|                                                                | Self-management: Health service navigation                                                     | Hei-Q                                           | 0, 4 months | I: 3.08 (0.43)<br>C: 3.14 (0.51)    | I: 3.27 (0.56)<br>C: 3.21 (0.60)   | Yes |
| Trompetter, 2015                                               | Awareness of personal values and the degree to which this guide person's actions in daily life | Engaged Living Scale                            | 0, 3 months | I:51.5 (10.4)<br>C: 51.5 (9.9)      | I: 55.1 (12.4)<br>C: 56.1 (12.8)   | No  |
|                                                                | The degree to which pain interferes with daily activities                                      | Multidimensional Pain Inventory                 | 0, 3 months | I: 32.3 (9.8)<br>C: 32.2 (9.8)      | I: 28.7 (12.0)<br>C: 32.7 (12.3)   | Yes |
| <b>Emotional outcomes</b>                                      |                                                                                                |                                                 |             |                                     |                                    |     |
| Dear, 2015<br>*regular                                         | Depression                                                                                     | Patient Health Questionnaire                    | 0, 8 weeks  | I: 11.55 (5.88)<br>C: 10.90 (4.76)  | I: 6.30 (4.57)<br>C: 6.96 (4.29)   | No  |

|                                          |                                              |                                                                          |             |                                    |                                    |     |
|------------------------------------------|----------------------------------------------|--------------------------------------------------------------------------|-------------|------------------------------------|------------------------------------|-----|
| contact group                            |                                              | 9-item                                                                   |             |                                    |                                    |     |
|                                          | Anxiety                                      | Generalized Anxiety Disorder 7-item                                      |             | I: 8.40 (5.52)<br>C: 8.28 (4.60)   | I: 4.91 (4.40)<br>C: 5.16 (3.91)   | No  |
| Dear, 2015<br>*optional<br>contact group | Depression                                   | Patient Health Questionnaire 9-item                                      | 0, 8 weeks  | I: 10.60 (5.33)<br>C: 10.90 (4.76) | I: 7.20 (5.25)<br>C: 6.96 (4.29)   | No  |
|                                          | Anxiety                                      | Generalized Anxiety Disorder 7-item                                      |             | I: 7.98 (4.67)<br>C: 8.28 (4.60)   | I: 5.66 (4.94)<br>C: 5.16 (3.91)   | No  |
| McKay, 2001                              | Depression                                   | 10-item version of the Center for Epidemiologic Studies Depression scale | 0, 2 months | I: 16.9 (11.6)<br>C: 17.6 (10.4)   | I: 14.9 (12.5)<br>C: 19.9 (14.2)   | No  |
| Nobis, 2015                              | Depressive symptom severity                  | Center for Epidemiologic Studies Depression Scale                        | 0, 2 months | I: 32.7 (6.95)<br>C: 32.53 (7.51)  | I: 21.08 (8.84)<br>C: 28.90 (8.65) | Yes |
|                                          | Depressive symptoms                          | Hospital Anxiety and Depression Scale                                    | 0, 2 months | I: 11.99 (3.23)<br>C: 11.69 (3.08) | I: 8.12 (3.92)<br>C: 11.26 (3.72)  | Yes |
|                                          | Emotional distress related to living with DM | Problem Areas in Diabetes Scale                                          | 0, 2 months | I: 10.24 (4.27)<br>C: 10.57 (4.52) | I: 8.35 (3.94)<br>C: 10.87 (4.67)  | Yes |
| Trompetter, 2015                         | Anxiety                                      | Hospital Anxiety and Depression Scale                                    | 0, 3 months | I: 7.2 (3.3)<br>C: 6.5 (3.4)       | I: 6.0 (3.8)<br>C: 5.7 (3.8)       | No  |
|                                          | Depression                                   | Hospital Anxiety and Depression Scale                                    | 0, 3 months | I: 6.1 (3.4)<br>C: 7.5 (3.3)       | I: 5.1 (3.7)<br>C: 5.9 (3.9)       | No  |

| Quality of life    |                                                             |                                              |              |                                      |                                      |     |
|--------------------|-------------------------------------------------------------|----------------------------------------------|--------------|--------------------------------------|--------------------------------------|-----|
| De Boer, 2014      | Health related quality of life: Physical functioning        | RAND-36 subscale Physical functioning        | 0, 4 months  | I: 50.10 (17.20)<br>C: 52.50 (22.94) | I: 58.50 (22.37)<br>C: 55.88 (22.35) | Yes |
|                    | Health related quality of life: Social functioning          | RAND-36 subscale Social functioning          | 0, 4 months  | I: 49.34 (23.74)<br>C: 47.92 (23.79) | I: 65.79 (26.95)<br>C: 54.17 (27.00) | Yes |
|                    | Health related quality of life: Role impairment (physical)  | RAND-36 subscale Role impairment (physical)  | 0, 4 months  | I: 15.79 (29.12)<br>C: 15.63 (24.24) | I: 37.24 (41.89)<br>C: 22.19 (34.89) | No  |
|                    | Health related quality of life: Role impairment (emotional) | RAND-36 subscale Role impairment (emotional) | 0, 4 months  | I: 59.65 (42.42)<br>C: 57.97 (44.06) | I: 71.93 (41.96)<br>C: 67.39 (40.97) | No  |
|                    | Health related quality of life: Mental health               | RAND-36 subscale Mental health               | 0, 4 months  | I: 62.74 (18.95)<br>C: 65.83 (18.80) | I: 70.11 (20.76)<br>C: 66.17 (17.61) | No  |
|                    | Health related quality of life: Vitality                    | RAND-36 subscale Vitality                    | 0, 4 months  | I: 41.32 (15.35)<br>C: 39.79 (16.84) | I: 52.63 (20.30)<br>C: 40.63 (14.69) | Yes |
|                    | Health related quality of life: Pain                        | RAND-36 subscale Pain                        | 0, 4 months  | I: 37.16 (14.73)<br>C: 38.76 (17.87) | I: 50.70 (18.60)<br>C: 39.80 (19.35) | Yes |
|                    | Health related quality of life: General health appraisal    | RAND-36 subscale General health appraisal    | 0, 4 months  | I: 49.33 (23.35)<br>C: 42.50 (22.84) | I: 56.63 (27.69)<br>C: 43.54 (20.51) | No  |
|                    | Health related quality of life: Perceived health change     | RAND-36 subscale Perceived health change     | 0, 4 months  | I: 28.75 (24.70)<br>C: 38.54 (30.38) | I: 51.25 (23.61)<br>C: 38.54 (34.56) | Yes |
| Van den Berg, 2006 | Disease related quality of life                             | Rheumatoid Arthritis                         | 0, 12 months | I: 10.0 (10.2)<br>C: 10.0 (9.5)      | I: 8.7 (6.1)<br>C: 9.4 (3.6)         | Yes |



|  |                                               |                                 |              |                                  |                                  |     |
|--|-----------------------------------------------|---------------------------------|--------------|----------------------------------|----------------------------------|-----|
|  |                                               | Quality of Life                 |              |                                  |                                  |     |
|  | Quality of life:<br>physical<br>summary scale | RAND-36:<br>physical<br>summary | 0, 12 months | I: 52.8 (40.1)<br>C: 54.4 (42.8) | I: 47.9 (17.6)<br>C: 50.4 (18.2) | Yes |
|  | Quality of life:<br>mental<br>summary         | RAND-36:<br>mental<br>summary   | 0, 12 months | I: 75.1 (26.2)<br>C: 73.0 (30.5) | I: 74.9 (21.0)<br>C: 72.2 (12.2) | No  |
