# Supplementary material for: Blended Interventions to Change Behavior in Patients With Chronic Somatic Disorders: Systematic Review
Source: PubMed Central journal article supplement (PMC5754569; doi:10.2196/jmir.8108), 2017-12-21
Supplement: jmir_v19i12e418_app6.pdf [file jmir_v19i12e418_app6.pdf]

| Author, year of publication               | Outcome measure              | Instrument                                | Time of measurement (pre- and post-treatment) | Pre-treatment mean (SD)            | Post-treatment mean (SD)          | Significant effect |
|-------------------------------------------|------------------------------|-------------------------------------------|-----------------------------------------------|------------------------------------|-----------------------------------|--------------------|
| <b>Symptoms and signs</b>                 |                              |                                           |                                               |                                    |                                   |                    |
| Allen, 2013<br>* intensive counseling     | Body weight                  | Weighing scale                            | 0, 6 months                                   | I: 100.3 (16.5)<br>C: 96.0 (17.4)  | I: 94.9 (4.0)<br>C: 93.5 (4.1)    | No                 |
|                                           | BMI                          | Scale and meter                           | 0, 6 months                                   | I: 34.3 (3.9)<br>C: 34.1 (4.1)     | I: 32.5 (1.3)<br>C: 33.3 (1.4)    | No                 |
|                                           | Male waist circumference     | Measuring tape                            | 0, 6 months                                   | I: 119.4 (11.6)<br>C: 117.3 (15.5) | I: 112.4 (2.6)<br>C: 114.3 (2.4)  | No                 |
|                                           | Female waist circumference   | Measuring tape                            | 0, 6 months                                   | I: 109.7 (11.4)<br>C: 106.4 (14.5) | I: 104.0 (3.7)<br>C: 103.2 (7.4)  | No                 |
| Allen, 2013<br>*less intensive counseling | Body weight                  | Weighing scale                            | 0, 6 months                                   | I: 96.8 (14.8)<br>C: 96.0 (17.4)   | I: 93.5 (5.9)<br>C: 93.5 (4.1)    | No                 |
|                                           | BMI                          | Scale and meter                           | 0, 6 months                                   | I: 33.5 (3.5)<br>C: 34.1 (4.1)     | I: 32.4 (2.0)<br>C: 33.3 (1.4)    | No                 |
|                                           | Male waist circumference     | Measuring tape                            | 0, 6 months                                   | I: 116.4 (4.6)<br>C: 117.3 (15.5)  | I: 109.9 (0.35)<br>C: 114.3 (2.4) | No                 |
|                                           | Female waist circumference   | Measuring tape                            | 0, 6 months                                   | I: 108.7 (8.4)<br>C: 106.4 (14.5)  | I: 105.1 (7.9)<br>C: 103.2 (7.4)  | No                 |
| De Boer, 2014                             | Pain-intensity               | Visual analogue scale                     | 0, 4 months                                   | I: 6.59 (1.94)<br>C: 5.61 (1.94)   | I: 5.19 (2.53)<br>C: 5.49 (2.32)  | No                 |
|                                           | Extend of fatigue            | Visual analogue scale                     | 0, 4 months                                   | I: 6.34 (2.28)<br>C: 6.63 (2.23)   | I: 5.91 (2.44)<br>C: 6.88 (2.32)  | No                 |
|                                           | Mean arterial blood pressure | Blood pressure test                       | 0, 4 months                                   | I: 95.1 (0.8)<br>C: 95.4 (0.8)     | I: 94.4 (0.9)<br>C: 94.6 (0.9)    | Yes                |
| Nordin, 2016                              | Pain                         | Visual Analogue Scale (average of 7 days) | 0, 4 months                                   | I: 66.1 (16.7)<br>C: 64.7 (16.2)   | I: 59.6 (21.0)<br>C: 54.8 (21.9)  | No                 |

| <b>Daily activity related limitations</b>                     |                                    |                                                     |                          |                                         |                                      |     |
|---------------------------------------------------------------|------------------------------------|-----------------------------------------------------|--------------------------|-----------------------------------------|--------------------------------------|-----|
| Allen, 2013<br>* intensive<br>counseling                      | Self-reported<br>activity          | Stanford 7-Day<br>Physical Activity<br>Recall       | 0, 6 months              | I:4.9 (5.7)<br>C:5.0 (5.2)              | I: 2.9 (5.4)<br>C: 3.6 (7.1)         | No  |
| Allen, 2013<br>*less intensive<br>counseling                  | Self-reported<br>activity          | Stanford 7-Day<br>Physical Activity<br>Recall       | 0, 6 months              | I: 5.3 (5.4)<br>C:5.0 (5.2)             | I:1.7 (5.5)<br>C: 3.6 (7.1)          | No  |
| Jasper, 2014                                                  | Insomnia                           | Insomnia Severity<br>Index                          | 0, 10 weeks              | I: 12.68 (5.91)<br>C: 12.40 (6.08)      | I: 8.70 (5.80)<br>C: 9.03 (6.75)     | No  |
| Van der<br>Weegen, 2015                                       | Physical<br>activity               | Pam<br>accelerometer                                | 0, post-<br>intervention | I: 39.29 (18.1)<br>C: 47.47 (26.5)      | I: 48.16 (23.8)<br>C: 46.28 (30.8)   | Yes |
| <b>Dealing with the chronic condition: cognitive measures</b> |                                    |                                                     |                          |                                         |                                      |     |
| De Boer, 2014                                                 | Pain-related<br>catastrophizing    | Pain<br>catastrophizing<br>scale                    | 0, 4 months              | I: 19.82 (13.9)<br>C: 20.38<br>(11.38)  | I: 11.00 (11.49)<br>C: 16.10 (11.56) | Yes |
|                                                               | Catastrophizing                    | Pain coping and<br>cognition list                   | 0, 4 months              | I: 3.12 (0.72)<br>C: 3.19 (0.89)        | I: 2.57 (0.86)<br>C: 3.11 (0.88)     | Yes |
|                                                               | Pain coping                        | Pain coping and<br>cognition list                   | 0, 4 months              | I: 3.17 (0.96)<br>C: 3.00 (0.64)        | I: 3.72 (0.79)<br>C: 3.14 (0.61)     | Yes |
|                                                               | Internal pain<br>management        | Pain coping and<br>cognition list                   | 0, 4 months              | I: 3.55 (0.67)<br>C: 3.15 (0.98)        | I: 4.30 (0.73)<br>C: 3.57 (0.84)     | Yes |
|                                                               | External pain<br>management        | Pain coping and<br>cognition list                   | 0, 4 months              | I: 2.23 (0.86)<br>C: 2.59 (0.94)        | I: 1.99 (0.63)<br>C: 2.40 (0.92)     | Yes |
| Jasper, 2014                                                  | Acceptance                         | Tinitis<br>Acceptance<br>Questionnaire              | 0, 10 weeks              | I: 42.07 (11.70)<br>C: 40.26<br>(11.87) | I: 47.91 (11.70)<br>C: 46.31 (11.96) | No  |
| Nordin, 2016                                                  | Self-efficacy<br>pain              | Arthritis Self-<br>Efficacy Scale:<br>pain subscale | 0, 4 months              | I: 45.8 (21.6)<br>C: 49.0 (20.4)        | I: 50.0 (23.4)<br>C: 49.3 (21.9)     | Yes |
|                                                               | Self-efficacy<br>other<br>symptoms | Arthritis Self-<br>Efficacy Scale:<br>pain subscale | 0, 4 months              | I: 52.6 (19.2)<br>C: 52.0 (16.7)        | I: 58.1 (21.5)<br>C: 56.1 (19.8)     | No  |
|                                                               | Self-efficacy<br>general           | General Self-<br>Efficacy Scale                     | 0, 4 months              | I: 2.90 (0.60)<br>C: 2.97 (0.46)        | I: 2.88 (0.58)<br>C: 3.06 (0.53)     | No  |

|                                                                |                                             |                                                                    |                      |                                  |                                  |     |
|----------------------------------------------------------------|---------------------------------------------|--------------------------------------------------------------------|----------------------|----------------------------------|----------------------------------|-----|
|                                                                | Coping strategy: diverting attention        | Coping Strategy Questionnaire: subscale diverting attention        | 0, 4 months          | I: 2.9 (1.4)<br>C: 2.8 (1.5)     | I: 3.2 (1.4)<br>C: 2.9 (1.7)     | No  |
|                                                                | Coping strategy: reinterpret pain sensation | Coping Strategy Questionnaire: subscale reinterpret pain sensation | 0, 4 months          | I: 1.8 (1.4)<br>C: 1.7 (1.4)     | I: 2.1 (1.3)<br>C: 1.8 (1.4)     | No  |
|                                                                | Coping strategy: catastrophizing            | Coping Strategy Questionnaire: subscale catastrophizing            | 0, 4 months          | I: 3.2 (1.4)<br>C: 2.8 (1.2)     | I: 2.8 (1.4)<br>C: 2.8 (1.4)     | Yes |
|                                                                | Coping strategy: ignore pain sensations     | Coping Strategy Questionnaire: subscale ignore pain sensations     | 0, 4 months          | I: 2.7 (1.2)<br>C: 2.8 (1.2)     | I: 2.9 (1.1)<br>C: 2.9 (1.3)     | Yes |
|                                                                | Coping strategy: praying or hoping          | Coping Strategy Questionnaire: subscale praying or hoping          | 0, 4 months          | I: 2.7 (1.6)<br>C: 2.6 (1.5)     | I: 2.8 (1.6)<br>C: 2.5 (1.7)     | No  |
|                                                                | Coping strategy: self-statements            | Coping Strategy Questionnaire: subscale ignore pain sensations     | 0, 4 months          | I: 3.1 (1.1)<br>C: 3.1 (1.3)     | I: 3.0 (1.2)<br>C: 2.9 (1.3)     | No  |
| Van der Weegen, 2015                                           | General self-efficacy                       | General Self-Efficacy Scale                                        | 0, post-intervention | I: 3.2 (0.5)<br>C: 3.2 (0.5)     | I: 3.3 (0.4)<br>C: 3.3 (0.5)     | No  |
|                                                                | Exercise self-efficacy                      | Exercise Self-Efficacy Scale                                       | 0, post-intervention | I: 55.4 (17.0)<br>C: 53.1 (21.3) | I: 59.7 (17.3)<br>C: 59.7 (19.6) | No  |
| <b>Dealing with the chronic condition: behavioral measures</b> |                                             |                                                                    |                      |                                  |                                  |     |
| De Boer, 2014                                                  | Pain interference with daily activities     | Visual analogue scale                                              | 0, 4 months          | I: 5.89 (2.14)<br>C: 5.93 (2.40) | I: 5.13 (2.52)<br>C: 6.33 (2.21) | No  |
| Nordin, 2016                                                   | Coping strategy: Increased                  | Coping Strategy Questionnaire: subscale praying                    | 0, 4 months          | I: 3.3 (1.1)<br>C: 3.1 (1.3)     | I: 3.4 (1.0)<br>C: 2.9 (1.3)     | No  |

|                           |                                                             |                                              |                      |                                      |                                      |    |
|---------------------------|-------------------------------------------------------------|----------------------------------------------|----------------------|--------------------------------------|--------------------------------------|----|
|                           | behavioral activities                                       | or hoping                                    |                      |                                      |                                      |    |
| <b>Emotional outcomes</b> |                                                             |                                              |                      |                                      |                                      |    |
| Jasper, 2014              | Tinnitus associated distress                                | Mini-Tinnitus Questionnaire                  | 0, 10 weeks          | I: 12.20 (4.58)<br>C: 14.19 (4.51)   | I: 7.44 (5.30)<br>C: 8.09 (4.93)     | No |
|                           | Tinnitus associated distress                                | Tinnitus Handicap Inventory                  | 0, 10 weeks          | I: 40.34 (17.64)<br>C: 44.33 (19.17) | I: 26.67 (20.75)<br>C: 27.70 (21.93) | No |
|                           | Anxiety                                                     | Hospital Anxiety and Depressiona Scale       | 0, 10 weeks          | I: 7.41 (3.56)<br>C: 7.79 (3.73)     | I: 5.44 (3.23)<br>C: 5.84 (3.82)     | No |
|                           | Depression                                                  | Hospital Anxiety and Depressiona Scale       | 0, 10 weeks          | I: 5.95 (4.21)<br>C: 6.02 (3.79)     | I: 4.41 (3.72)<br>C: 4.41 (3.92)     | No |
| <b>Quality of life</b>    |                                                             |                                              |                      |                                      |                                      |    |
| Van der Weegen, 2015      | Health related quality of life: Role impairment (physical)  | RAND-36 subscale Role impairment (physical)  | 0, post-intervention | I: 42.5 (11.1)<br>C: 46.1 (9.8)      | I: 45.2 (9.5)<br>C: 46.8 (10.0)      | No |
|                           | Health related quality of life: Role impairment (emotional) | RAND-36 subscale Role impairment (emotional) | 0, post-intervention | I: 48.2 (10.3)<br>C: 48.6 (11.7)     | I: 48.8 (10.6)<br>C: 51.6 (11.3)     | No |
